# Supplementary material for: Exploring the reductive CO 2 fixation with amines and hydrosilanes using readily available Cu( ii ) NHC–phenolate catalyst precursors
Source: Royal Society of Chemistry journal article supplement (doi:10.1039/d4dt02936d), 2024-01-01
Supplement: d4dt02936d1.pdf [file d4dt02936d1.pdf]

**Supporting information for the manuscript:**

**Exploring the reductive CO<sub>2</sub> fixation with amines and hydrosilanes  
using readily available Cu(II) NHC–phenolate catalyst precursors**

Giammarco Meloni,<sup>a,b</sup> Luca Morgan,<sup>a</sup> David Cappelletti,<sup>a</sup> Matteo Bevilacqua,<sup>a</sup> Claudia Graiff,<sup>c</sup>  
Piermaria Pinter,<sup>d</sup> Andrea Biffis,<sup>a,b</sup> Cristina Tubaro,<sup>\*a,b</sup> and Marco Baron<sup>\*a,b</sup>

*a. Dipartimento di Scienze Chimiche, Università degli Studi di Padova, via Marzolo 1, 35131 Padova, Italy.*

*b. Consorzio Interuniversitario per la Reattività Chimica e la Catalisi, Unità di Ricerca di Padova, via Marzolo 1, 35131 Padova, Italy.*

*c. Dipartimento di Scienze Chimiche, della Vita e della Sostenibilità Ambientale, Università degli Studi di Parma, Parco Area delle Scienze 17/A, 43124 Parma, Italy.*

*d. Novaled GmbH, Elisabeth-Boer-Straße 9, 01099 Dresden, Germany.*

\* marco.baron@unipd.it

**C O N T E N T S**

|     |                                            |    |
|-----|--------------------------------------------|----|
| 1.  | <sup>1</sup> H NMR spectra .....           | 2  |
| 2.  | <sup>13</sup> C NMR spectra .....          | 8  |
| 3.  | <sup>31</sup> P NMR spectra .....          | 12 |
| 4.  | <sup>19</sup> F NMR spectra .....          | 13 |
| 5.  | 2D NMR spectra .....                       | 15 |
| 6.  | ESI(+)-MS spectra.....                     | 15 |
| 7.  | FT-IR spectra .....                        | 18 |
| 8.  | UV-Vis spectra.....                        | 21 |
| 9.  | SC-XRD data.....                           | 24 |
| 10. | Catalysis .....                            | 26 |
| 11. | Stoichiometric reactions NMR spectra ..... | 31 |
| 12. | Computational details .....                | 41 |
| 13. | References .....                           | 44 |

## 1. $^1\text{H}$ NMR spectra

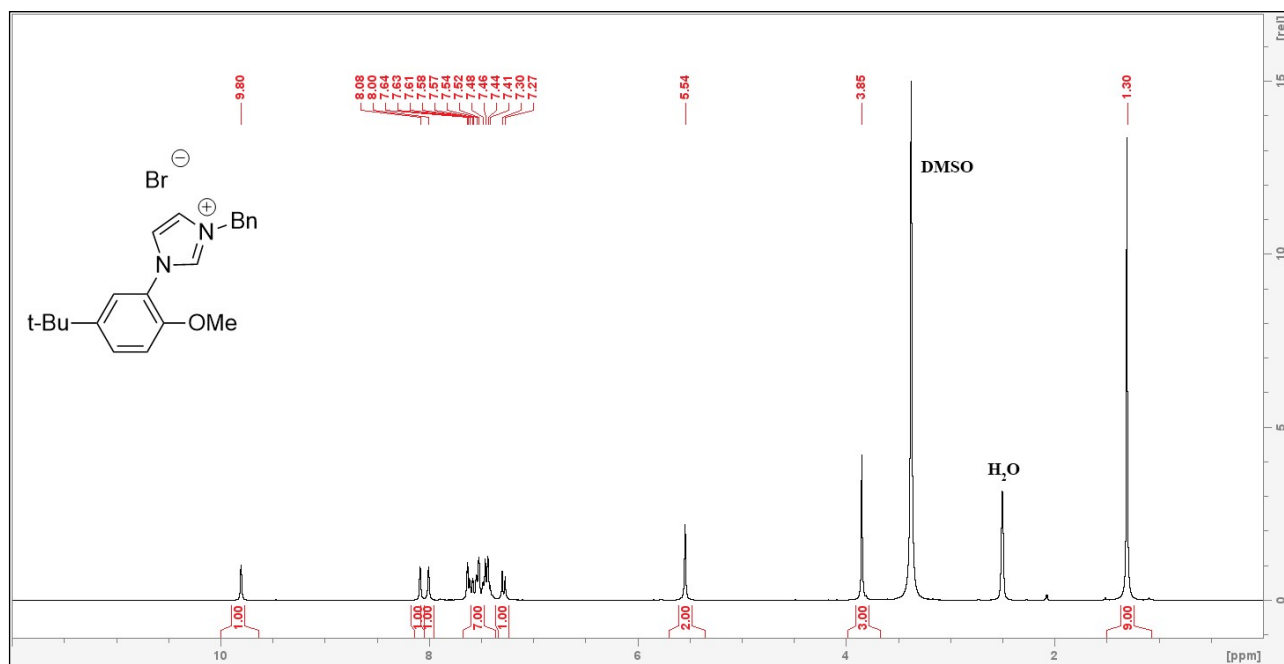

Figure S1.  $^1\text{H}$  NMR spectra of  $\text{Ha}^1\text{Br}$  in  $\text{DMSO-d}_6$ .

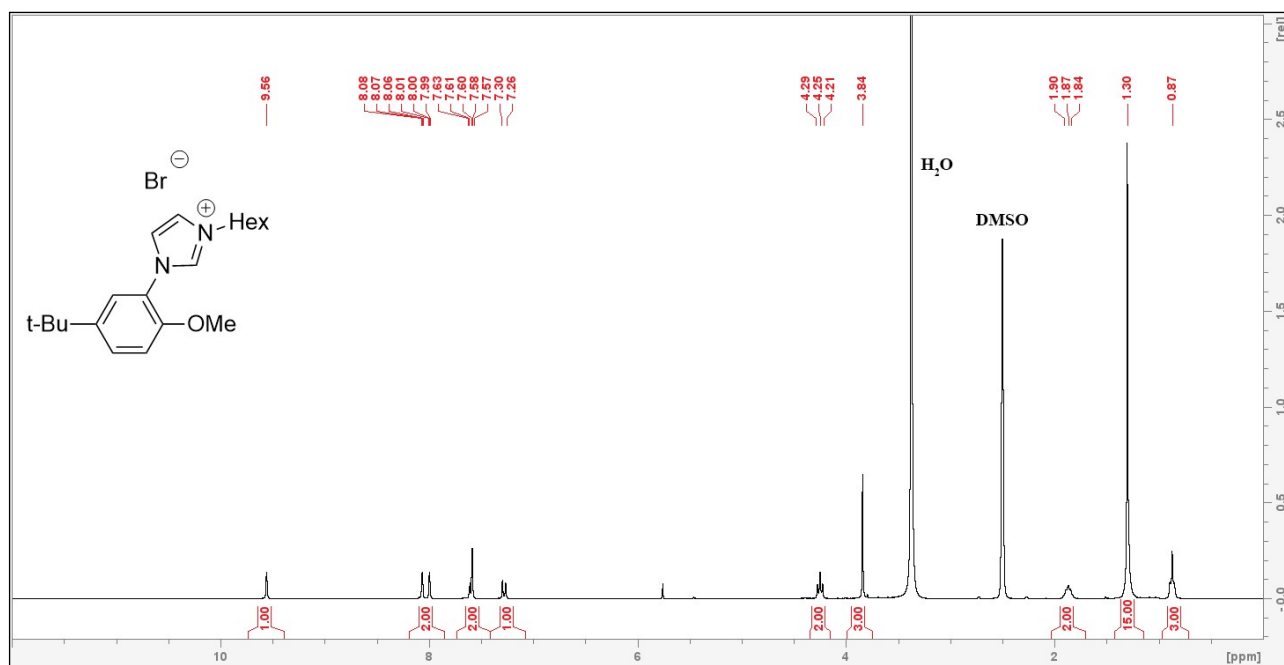

Figure S2.  $^1\text{H}$  NMR spectra of  $\text{Ha}^2\text{Br}$  in  $\text{DMSO-d}_6$ .

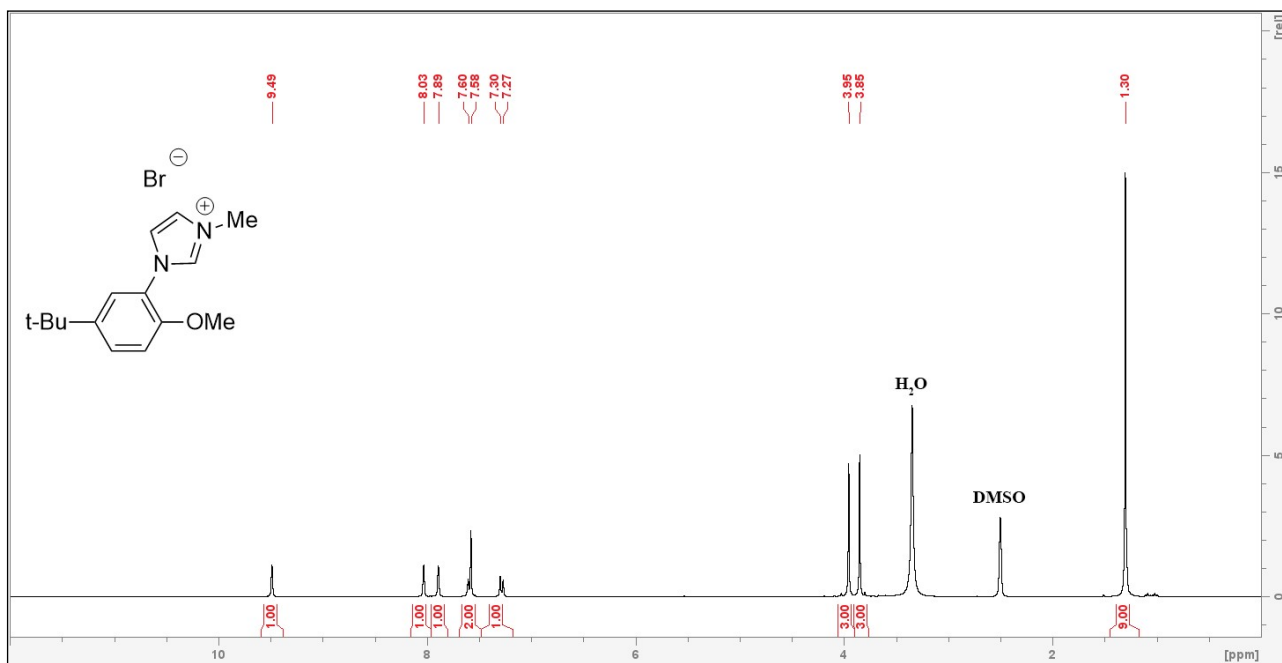

Figure S3.  $^1\text{H}$  NMR spectra of  $\text{H}_a^3\text{Br}$  in  $\text{DMSO}-d_6$ .

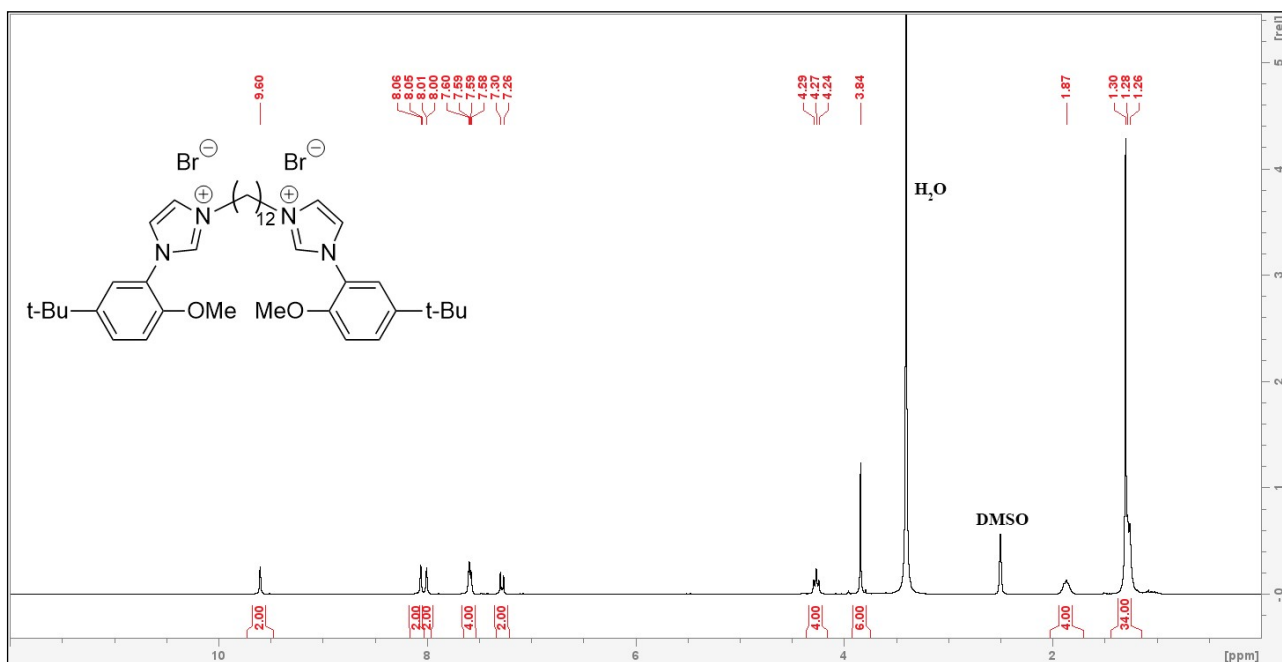

Figure S4.  $^1\text{H}$  NMR spectra of  $\text{H}_2\text{a}^4\text{Br}_2$  in  $\text{DMSO}-d_6$ .

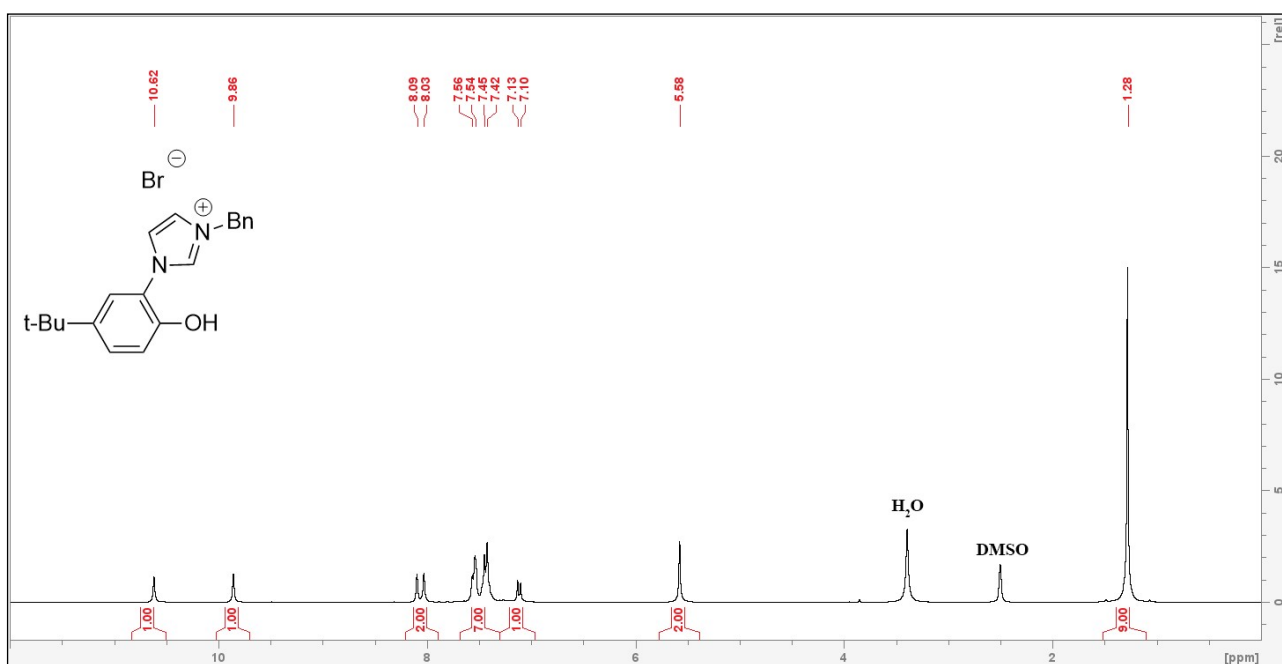

Figure S5.  $^1\text{H}$  NMR spectra of  $\text{H}_2\text{L}^1\text{Br}$  in  $\text{DMSO-d}_6$ .

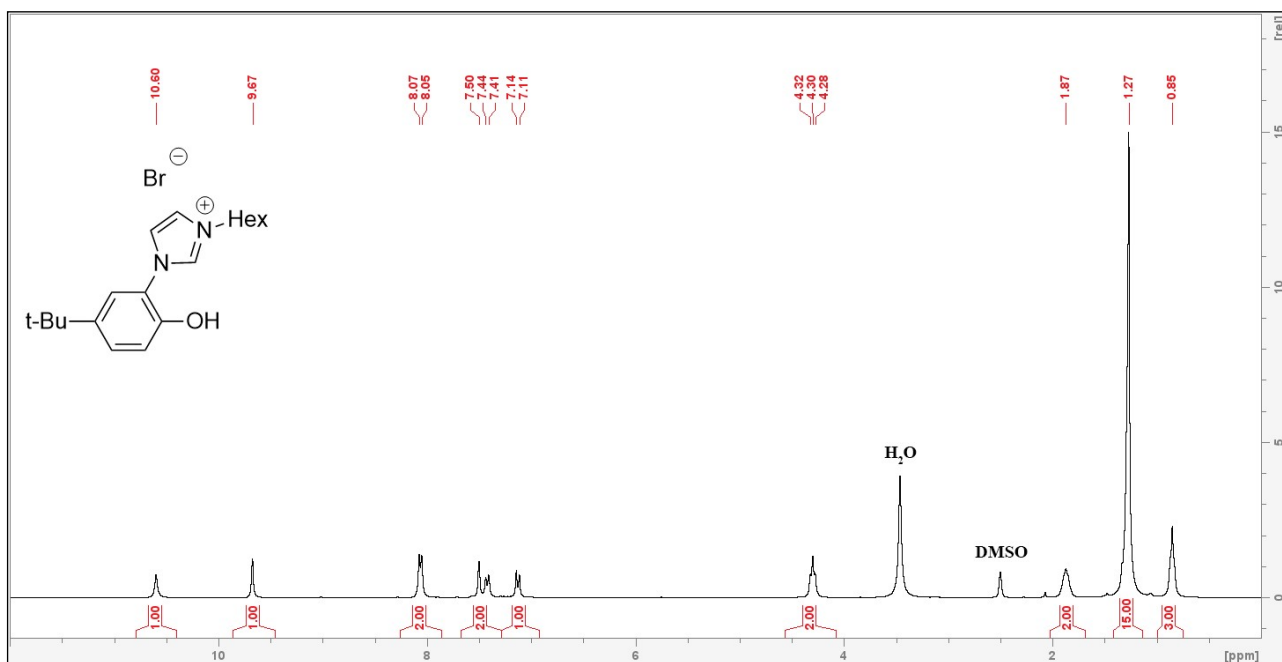

Figure S6.  $^1\text{H}$  NMR spectra of  $\text{H}_2\text{L}^2\text{Br}$  in  $\text{DMSO-d}_6$ .

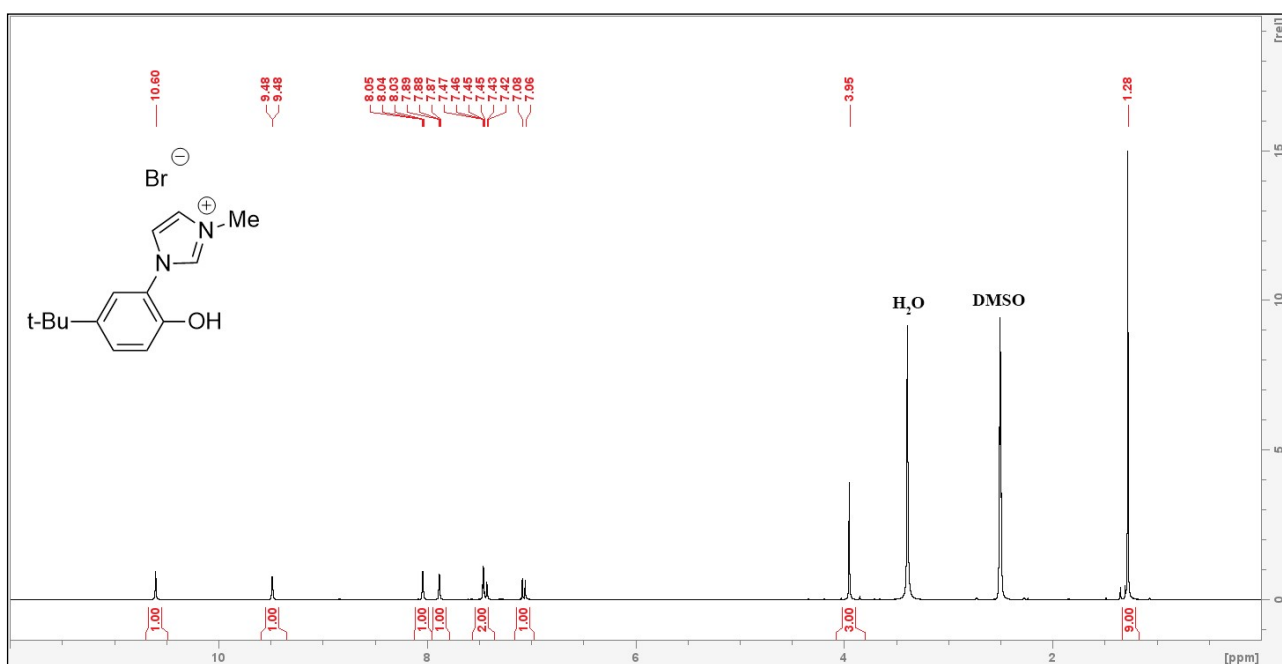

Figure S7.  $^1\text{H}$  NMR spectra of  $\text{H}_2\text{L}^3\text{Br}$  in  $\text{DMSO-d}_6$ .

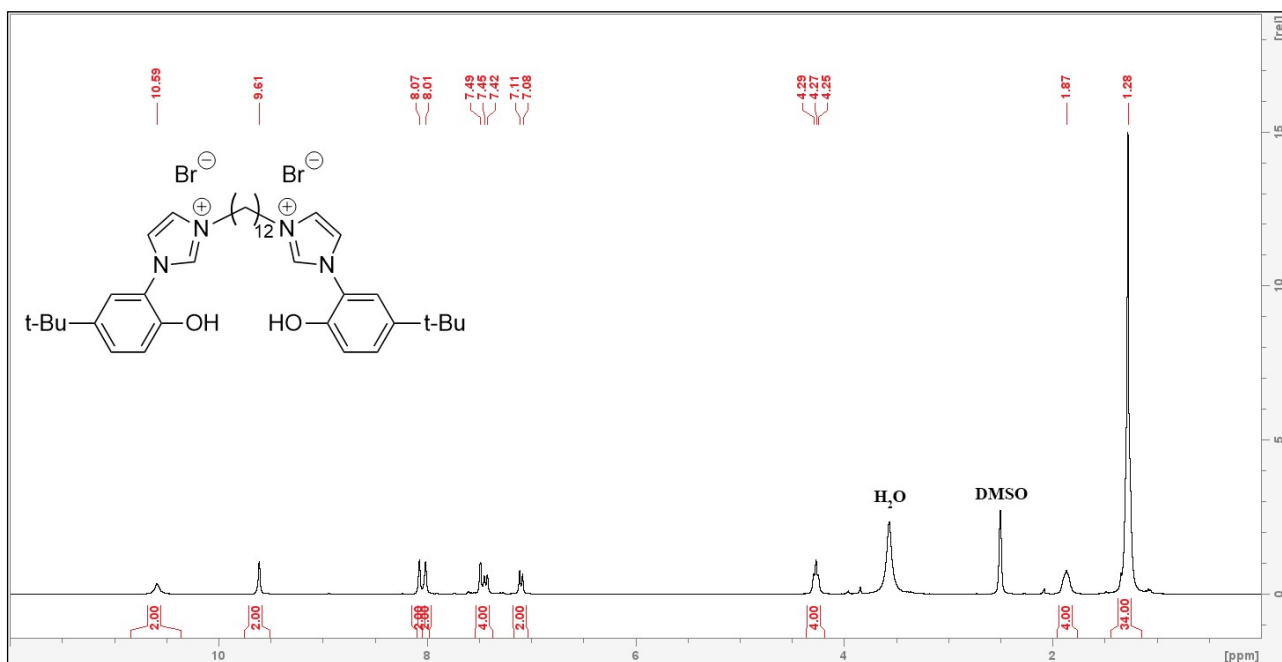

Figure S8.  $^1\text{H}$  NMR spectra of  $\text{H}_4\text{L}^4\text{Br}_2$  in  $\text{DMSO-d}_6$ .

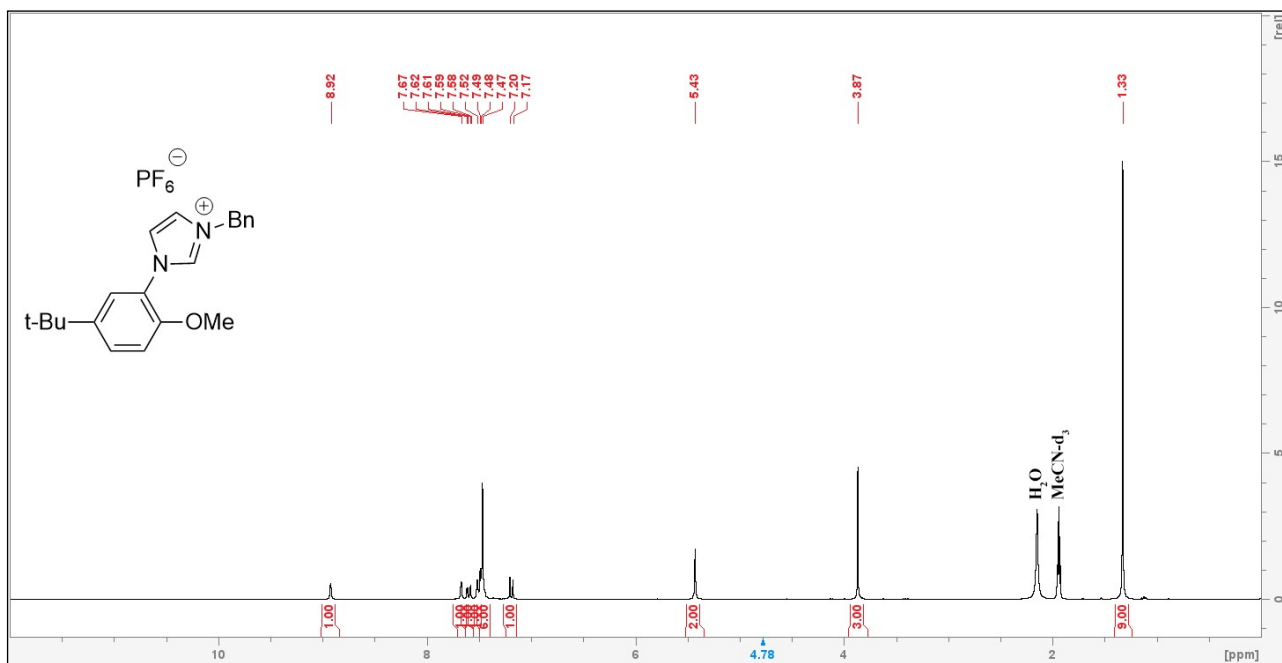

Figure S9.  $^1\text{H}$  NMR spectra of  $\text{Ha}^1\text{PF}_6$  in  $\text{CD}_3\text{CN}$ .

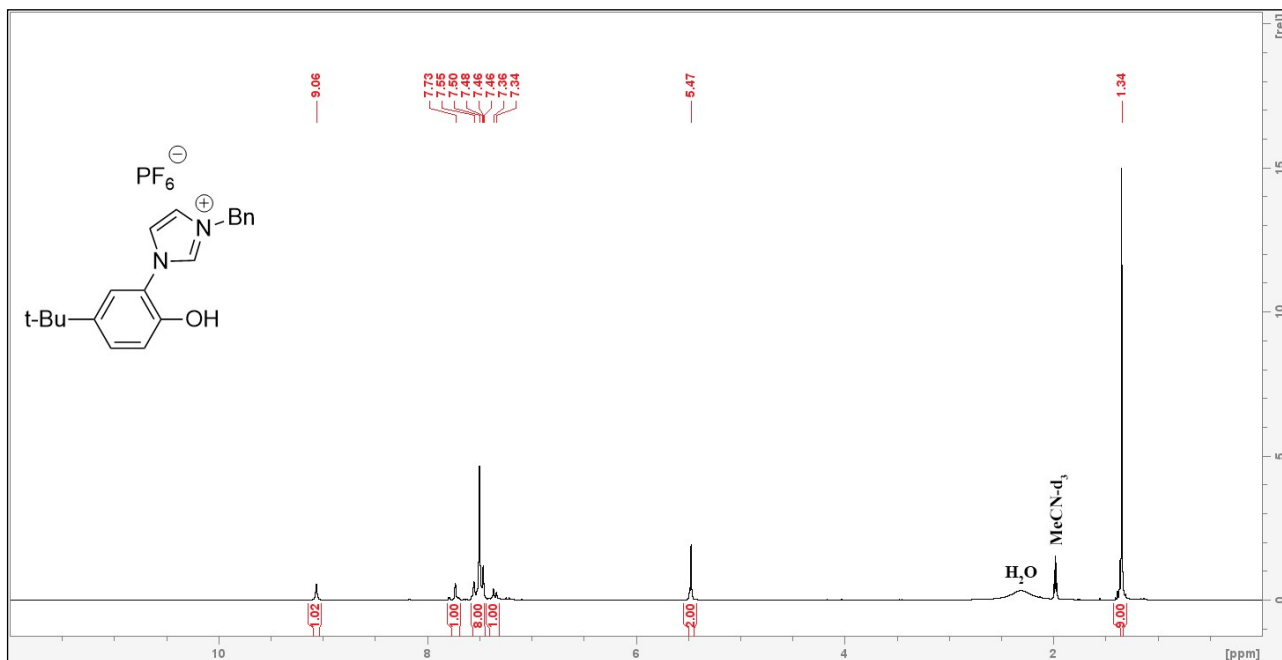

Figure S10.  $^1\text{H}$  NMR spectra of  $\text{H}_2\text{L}^1\text{PF}_6$  in  $\text{CD}_3\text{CN}$ .

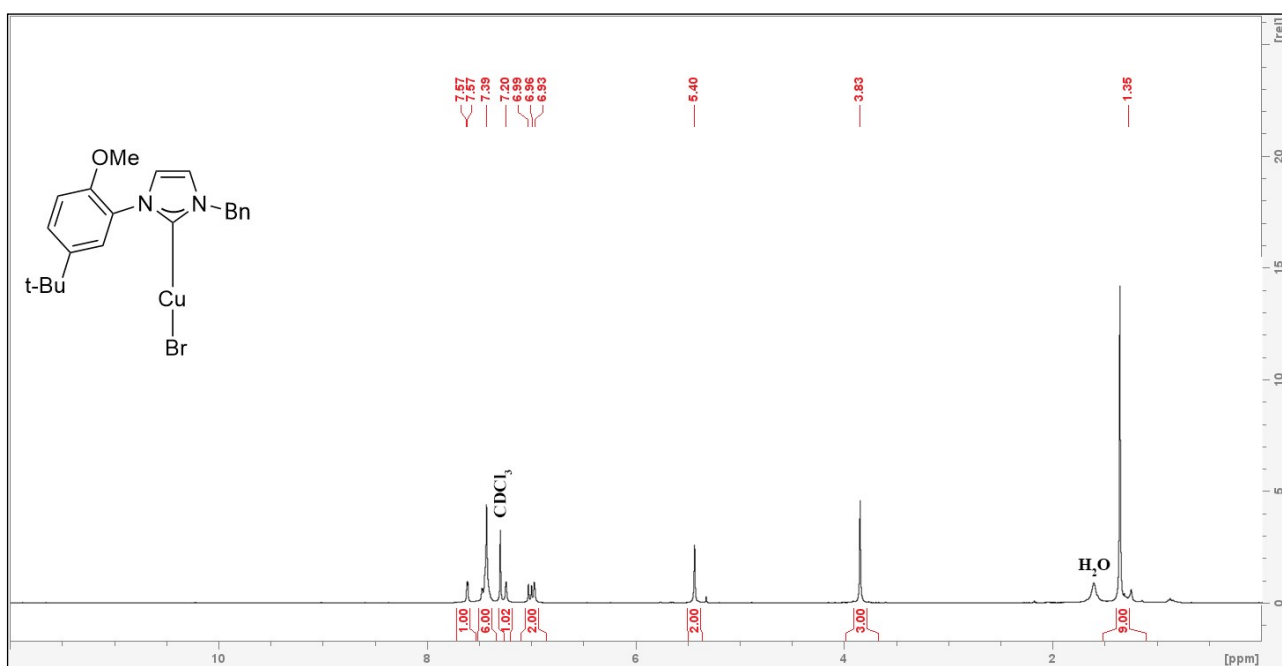

Figure S11.  $^1\text{H}$  NMR spectra of  $[\text{CuBr}(\mathbf{a}^1)]$  in  $\text{CDCl}_3$ .

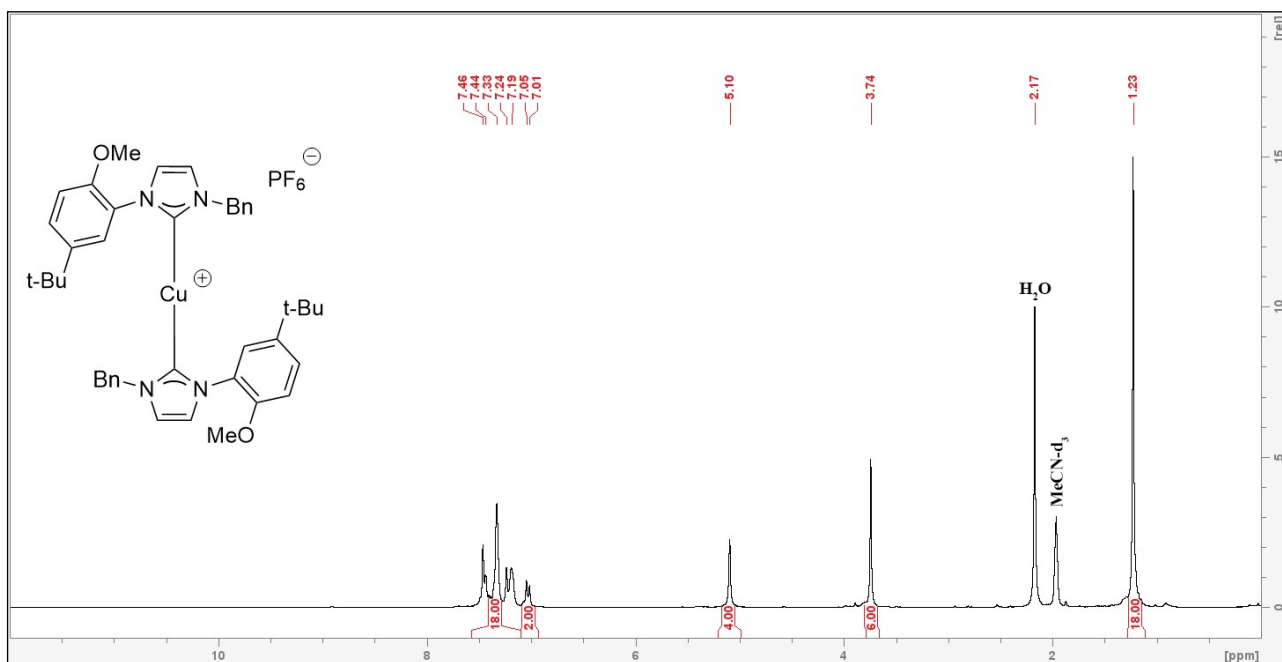

Figure S12.  $^1\text{H}$  NMR spectra of  $[\text{Cu}(\mathbf{a}^1)_2]\text{PF}_6$  in  $\text{CD}_3\text{CN}$ .

## 2. $^{13}\text{C}$ NMR spectra

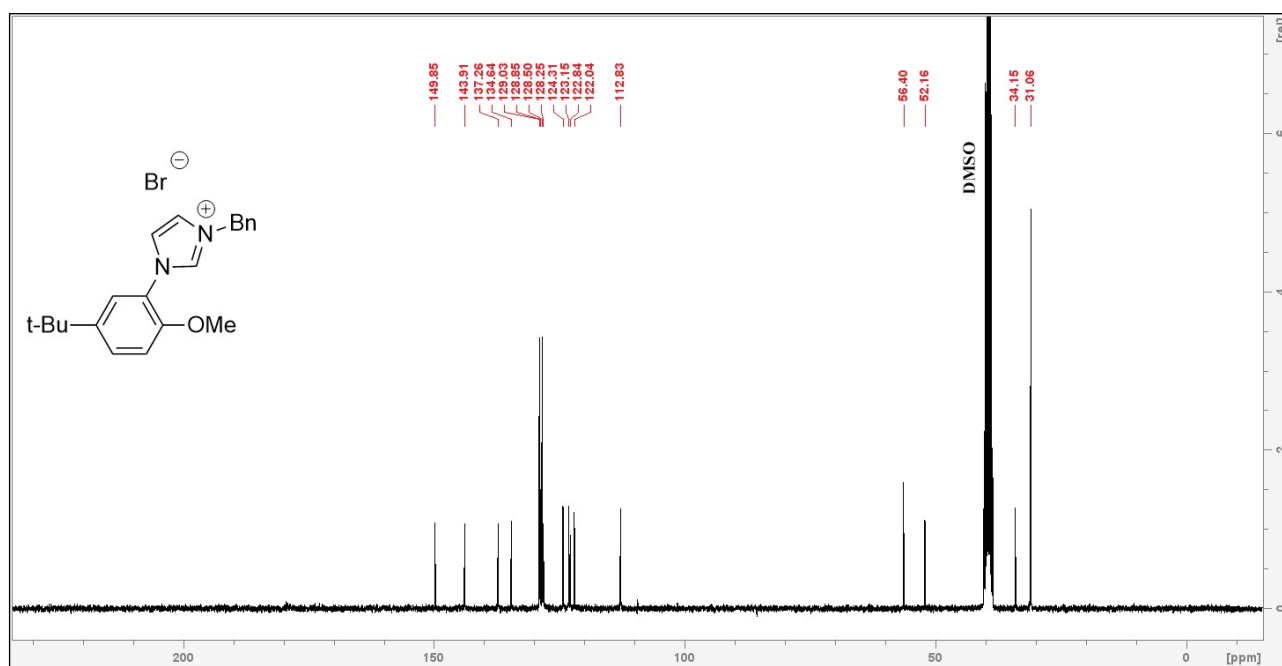

Figure S13.  $^{13}\text{C}$  NMR spectra of **Ha<sup>1</sup>Br** in  $\text{DMSO-d}_6$ .

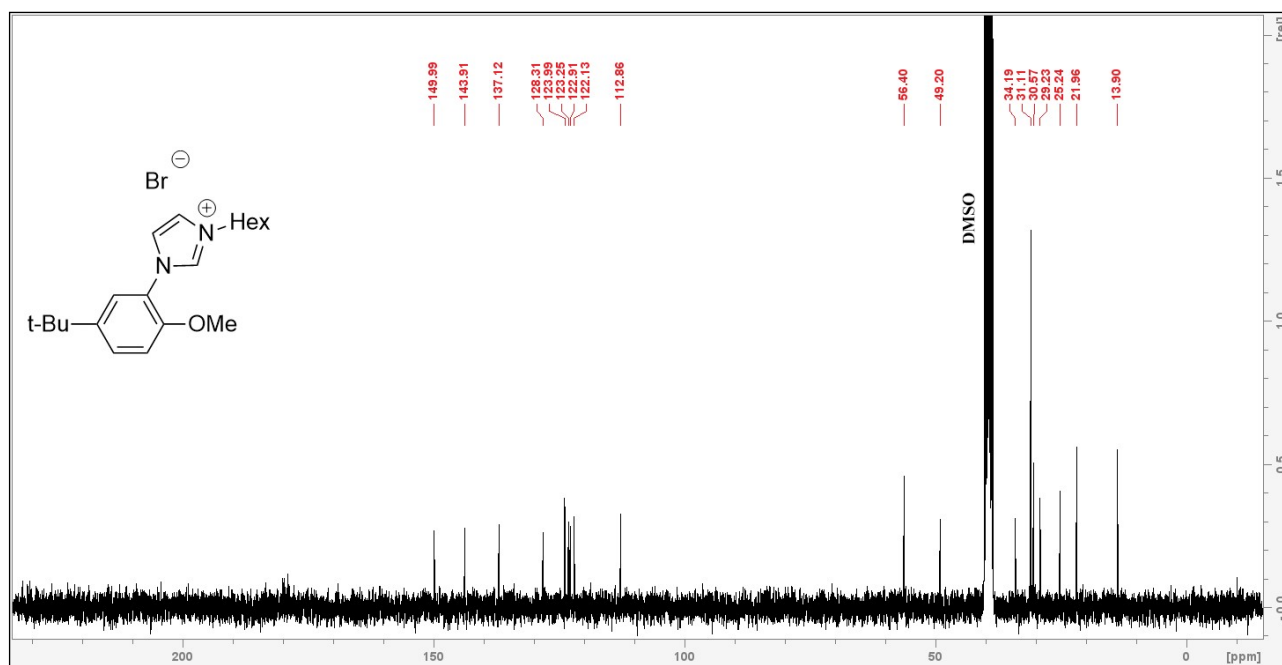

Figure S14.  $^{13}\text{C}$  NMR spectra of **Ha<sup>2</sup>Br** in  $\text{DMSO-d}_6$ .



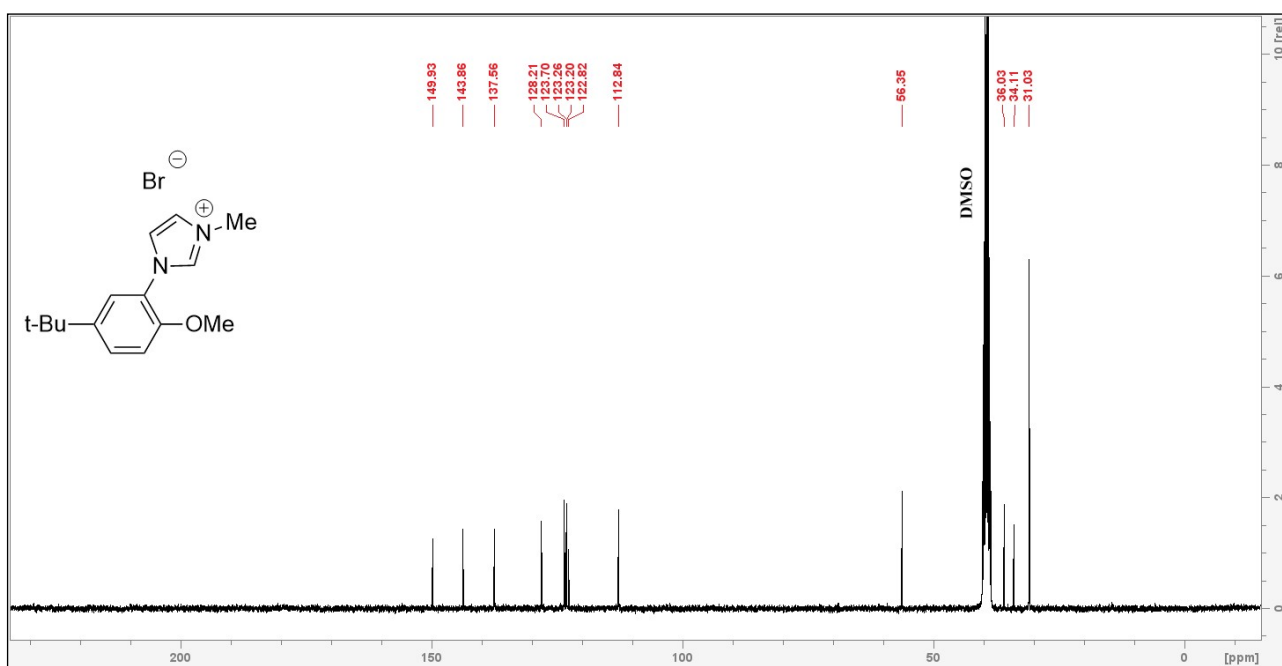

Figure S15.  $^{13}\text{C}$  NMR spectra of  $\text{Ha}^3\text{Br}$  in  $\text{DMSO-d}_6$ .

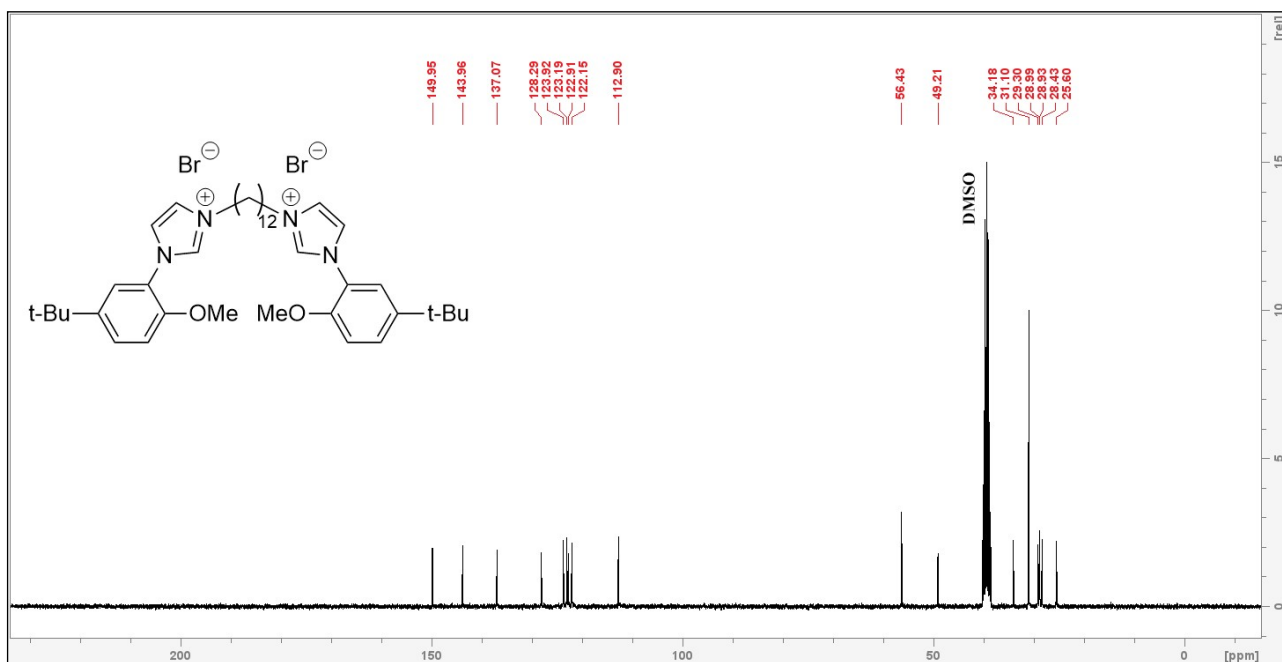

Figure S16.  $^{13}\text{C}$  NMR spectra of  $\text{H}_2\text{a}^4\text{Br}_2$  in  $\text{DMSO-d}_6$ .

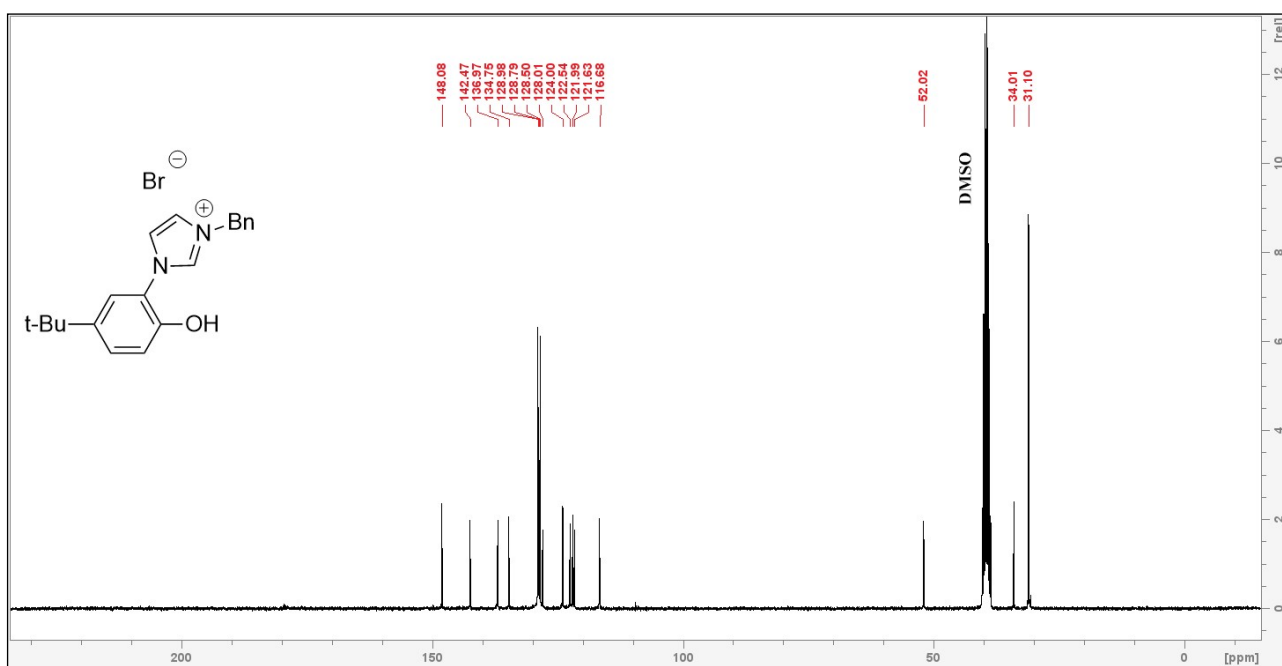

Figure S17.  $^{13}\text{C}$  NMR spectra of  $\text{H}_2\text{L}^1\text{Br}$  in  $\text{DMSO-d}_6$ .

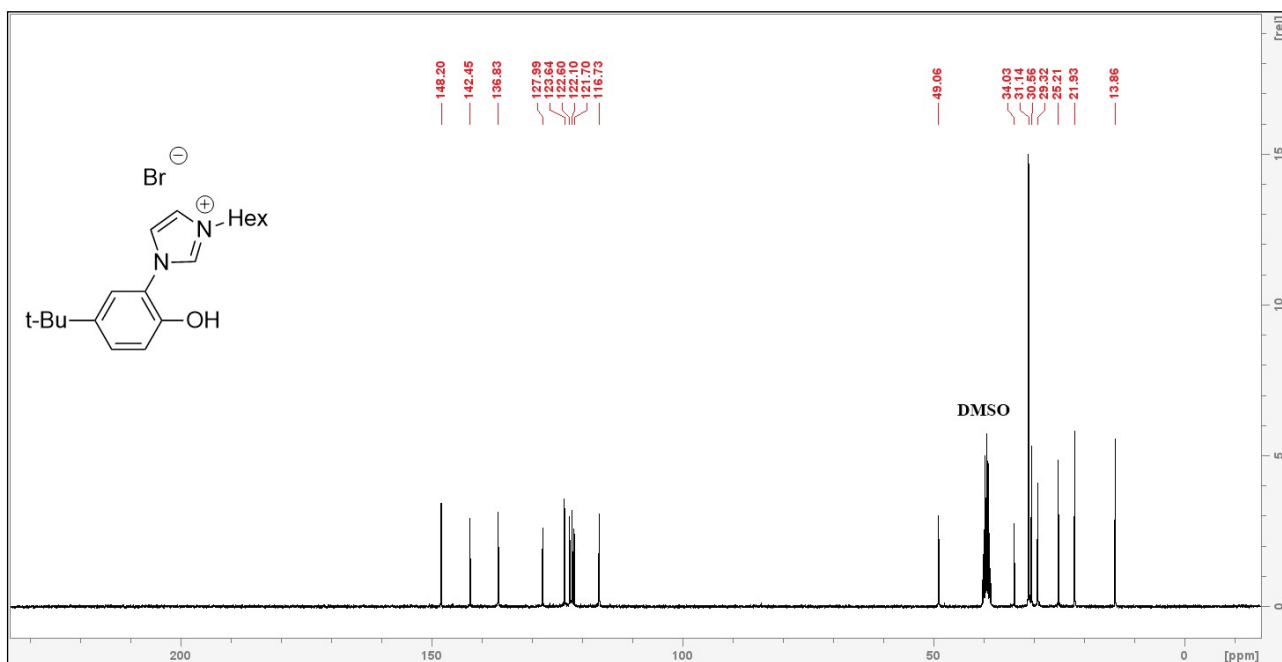

Figure S18.  $^{13}\text{C}$  NMR spectra of  $\text{H}_2\text{L}^2\text{Br}$  in  $\text{DMSO-d}_6$ .

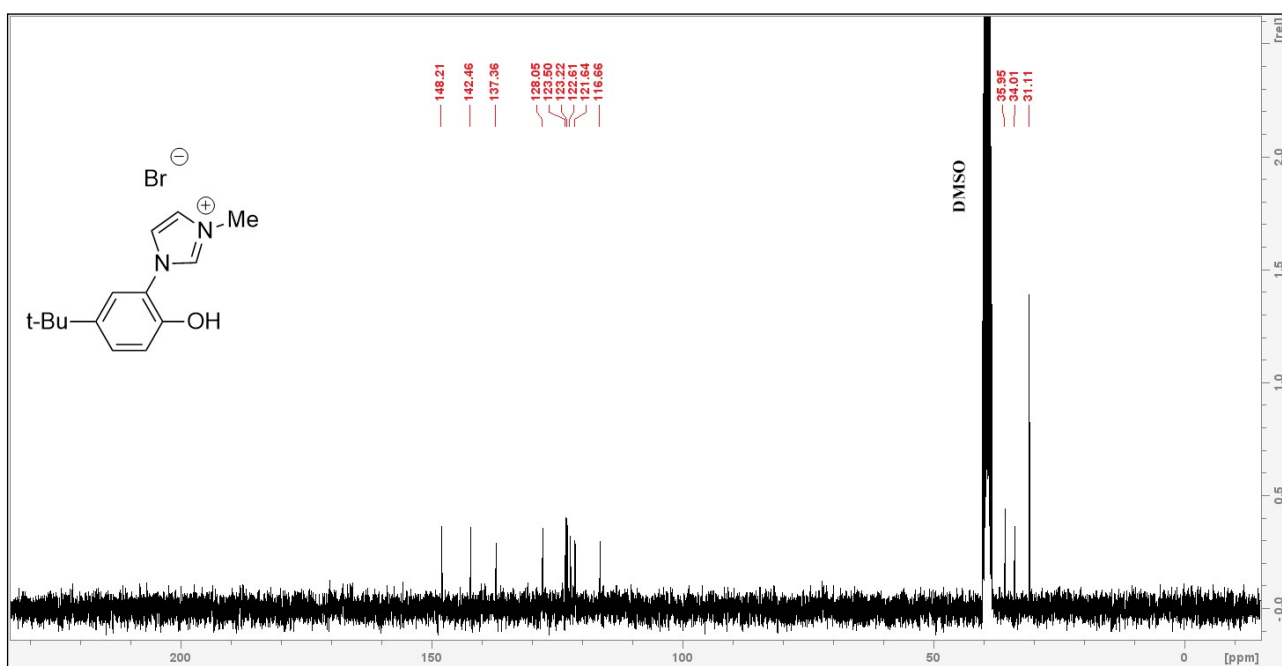

Figure S19.  $^{13}\text{C}$  NMR spectra of  $\text{H}_2\text{L}^3\text{Br}$  in  $\text{DMSO-d}_6$ .

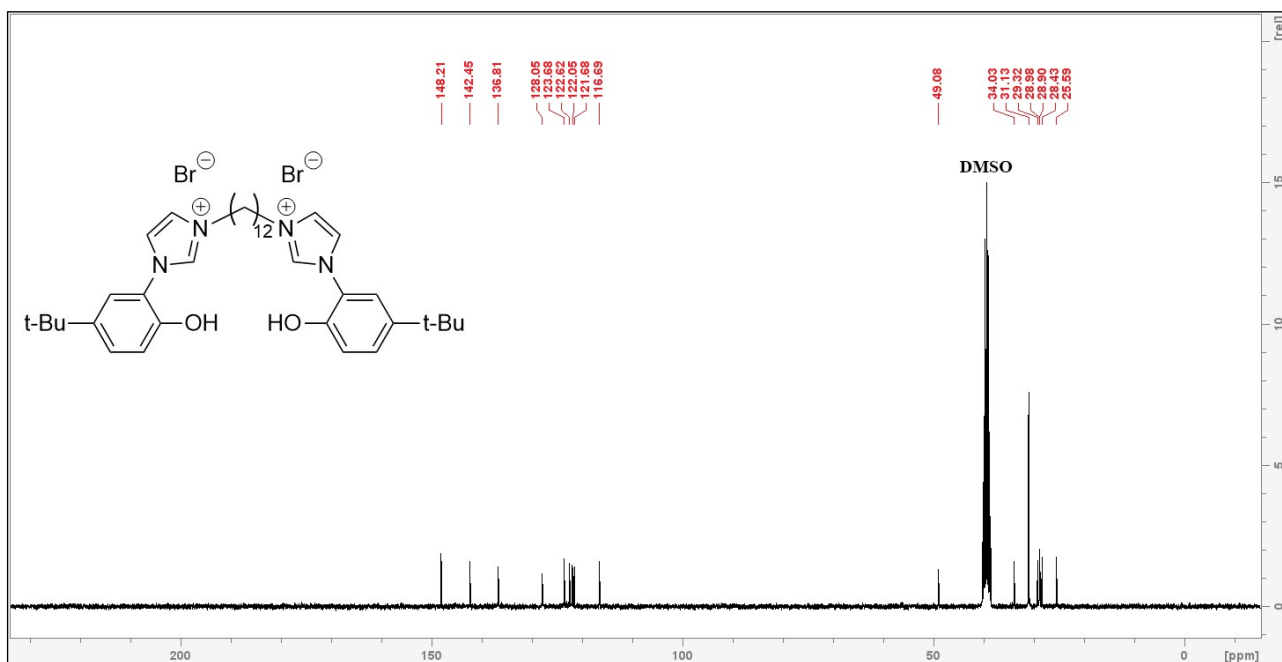

Figure S20.  $^{13}\text{C}$  NMR spectra of  $\text{H}_4\text{L}^4\text{Br}_2$  in  $\text{DMSO-d}_6$ .

### 3. $^{31}\text{P}$ NMR spectra

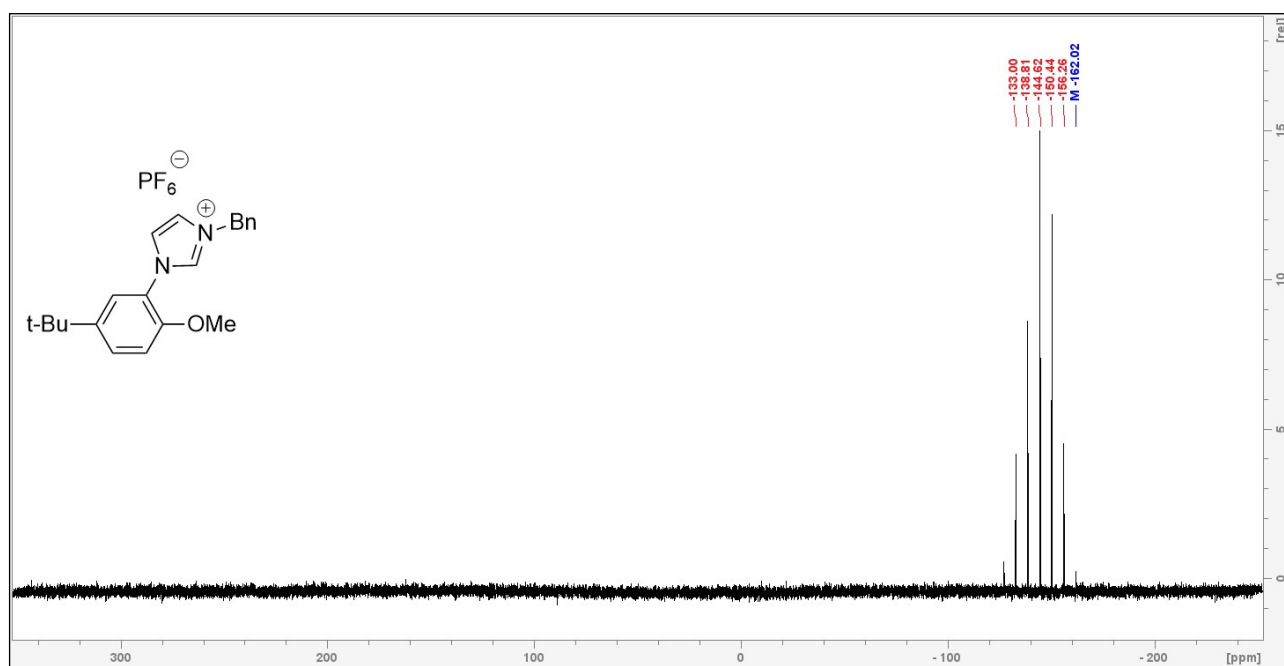

Figure S21.  $^{31}\text{P}$  NMR spectra of  $\text{Ha}^1\text{PF}_6$  in  $\text{CD}_3\text{CN}$ .

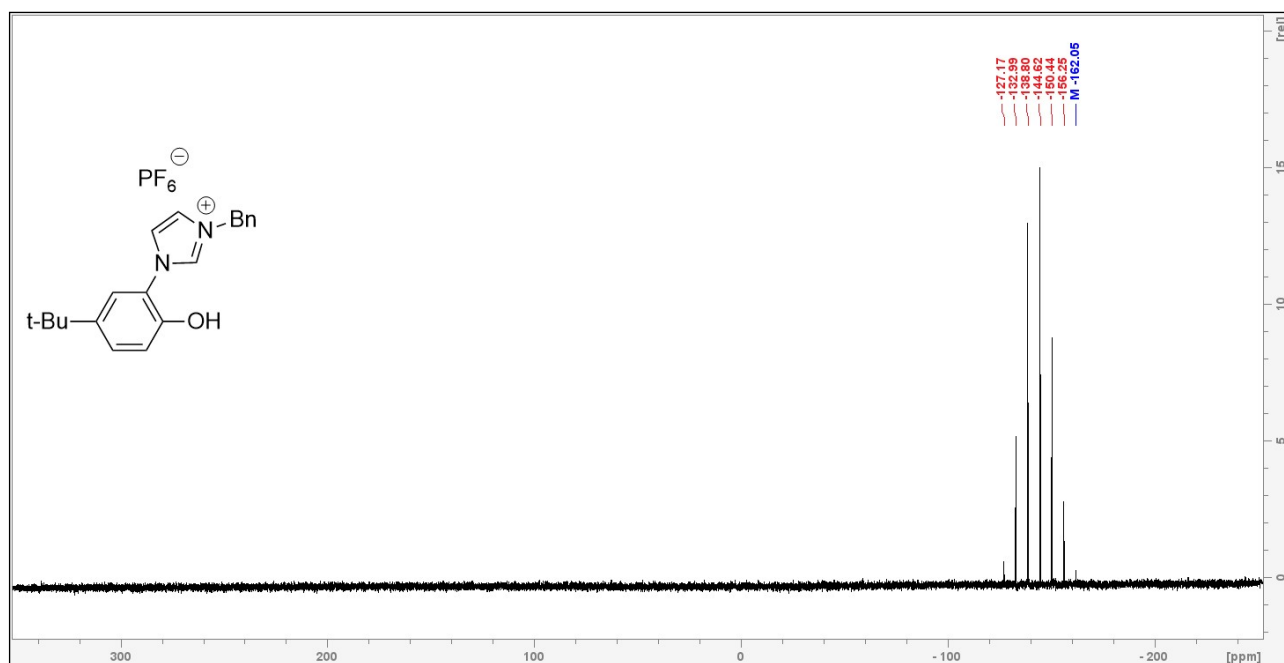

Figure S22.  $^{31}\text{P}$  NMR spectra of  $\text{H}_2\text{L}^1\text{PF}_6$  in  $\text{CD}_3\text{CN}$ .

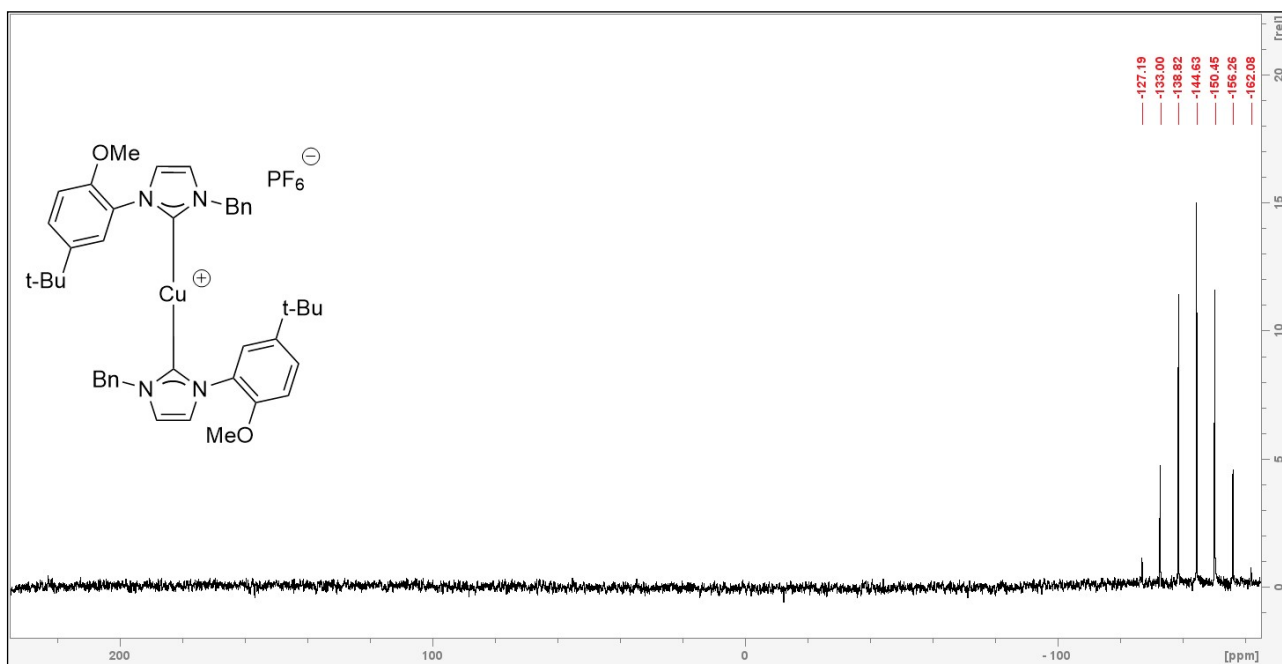

Figure S23.  $^{31}\text{P}$  NMR spectra of  $[\text{Cu}(\mathbf{a}^1)_2]\text{PF}_6$  in  $\text{CD}_3\text{CN}$ .

#### 4. $^{19}\text{F}$ NMR spectra

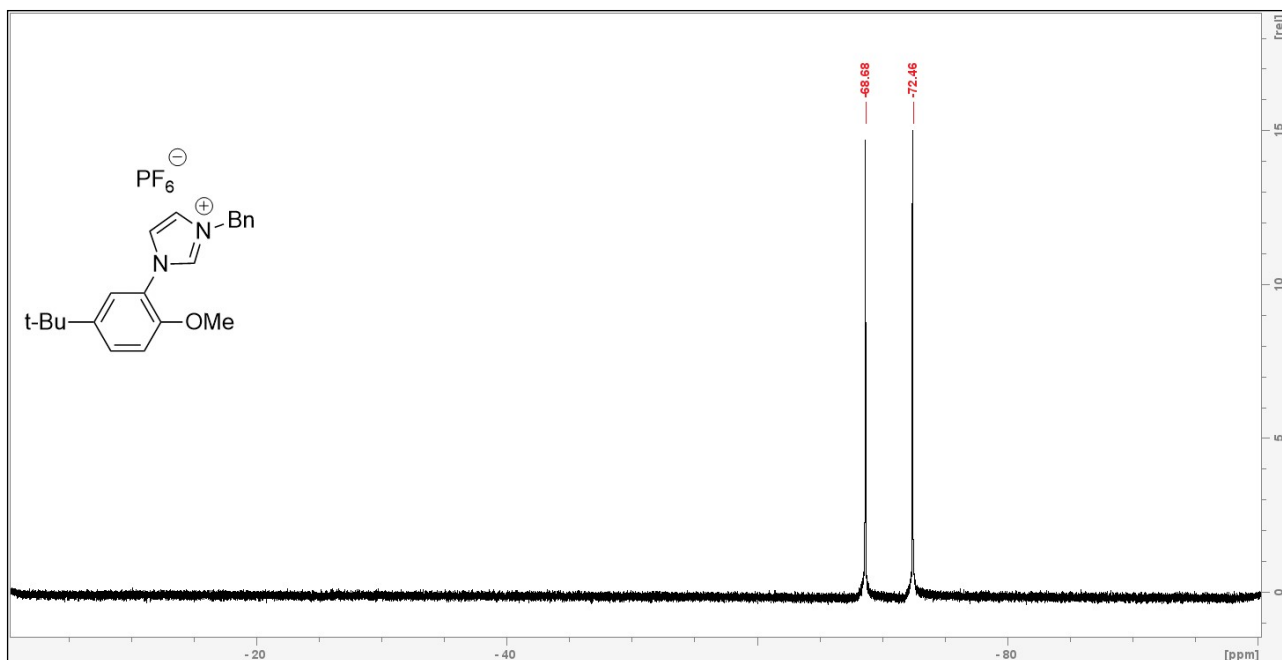

Figure S24.  $^{19}\text{F}$  NMR spectra of  $\text{Ha}^1\text{PF}_6$  in  $\text{CD}_3\text{CN}$ .

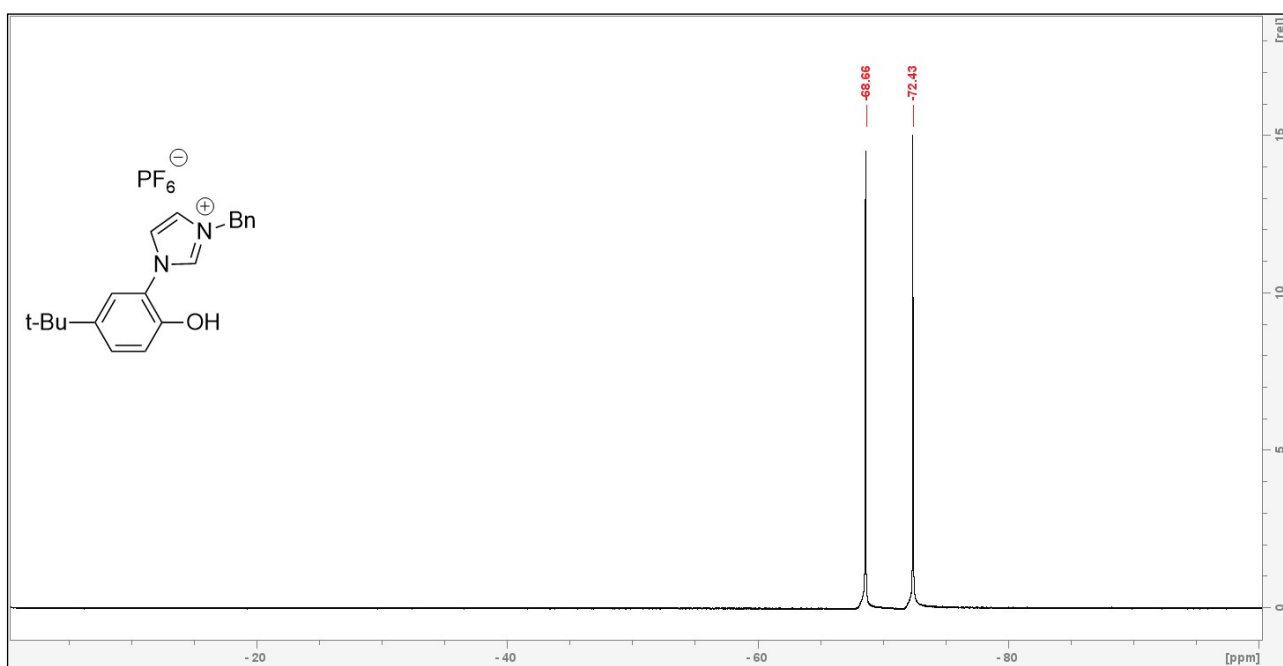

Figure S25.  $^{19}\text{F}$  NMR spectra of  $\text{H}_2\text{L}^3\text{Br}$  in  $\text{DMSO-d}_6$ .

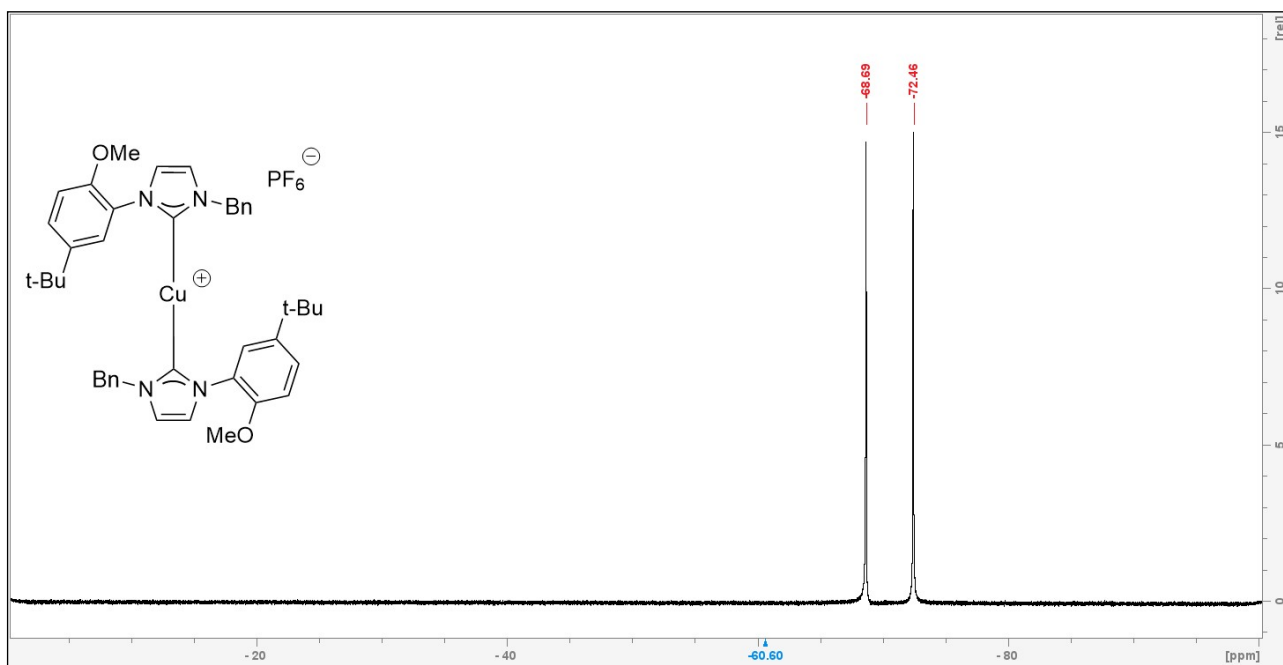

Figure S26.  $^{19}\text{F}$  NMR spectra of  $[\text{Cu}(\text{a}^1)_2]\text{PF}_6$  in  $\text{CD}_3\text{CN}$ .

## 5. 2D NMR spectra

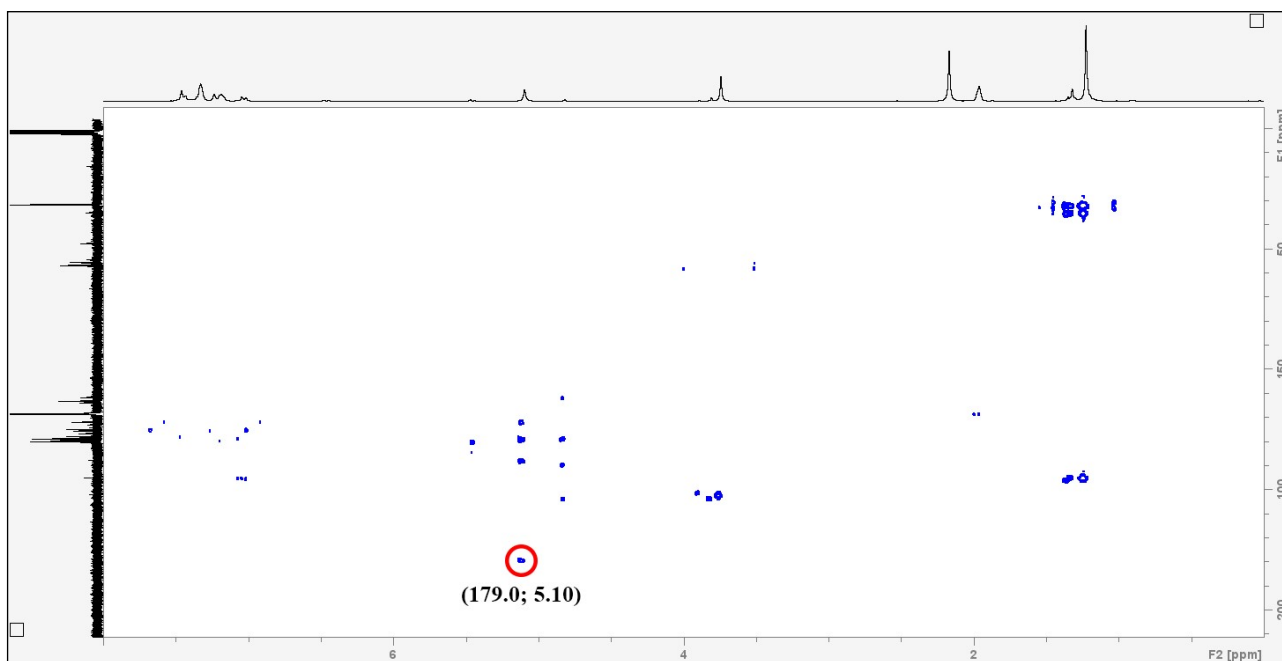

Figure S27. 2D NMR HMBC  $^{13}\text{C}$ - $^1\text{H}$  spectra of  $[\text{Cu}(\mathbf{a}^1)_2]\text{PF}_6$  in  $\text{CD}_3\text{CN}$ .

## 6. ESI(+)-MS spectra

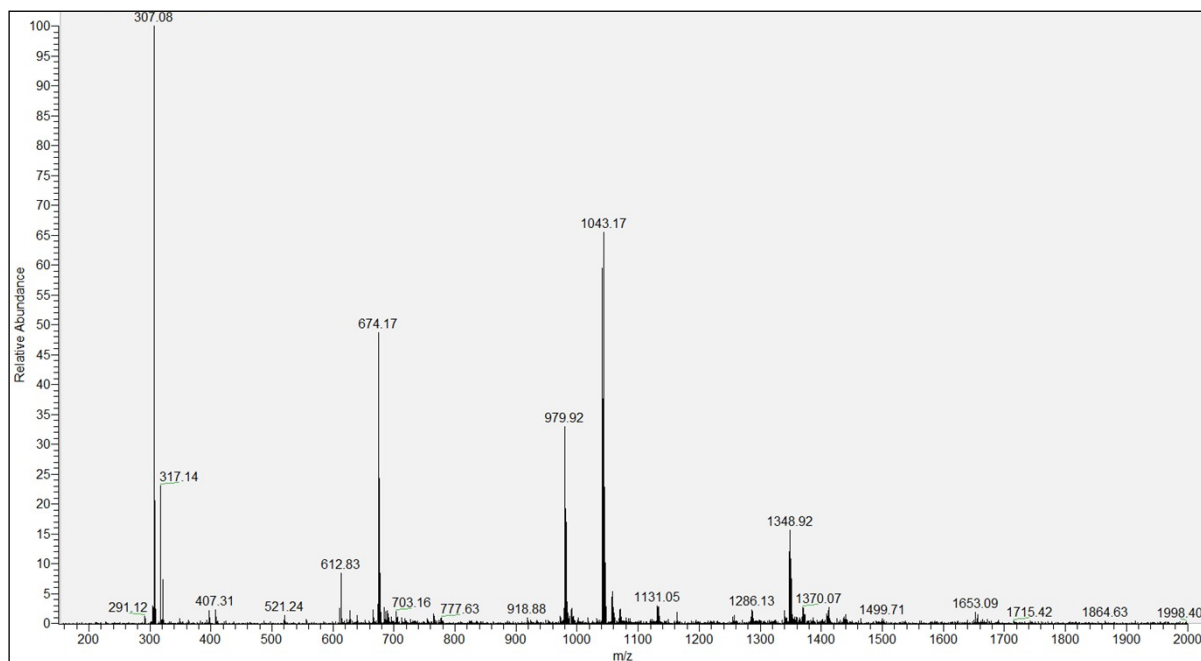

Figure S28. ESI-MS spectra of  $[\text{Cu}(\mathbf{L}^1)_2]$ .

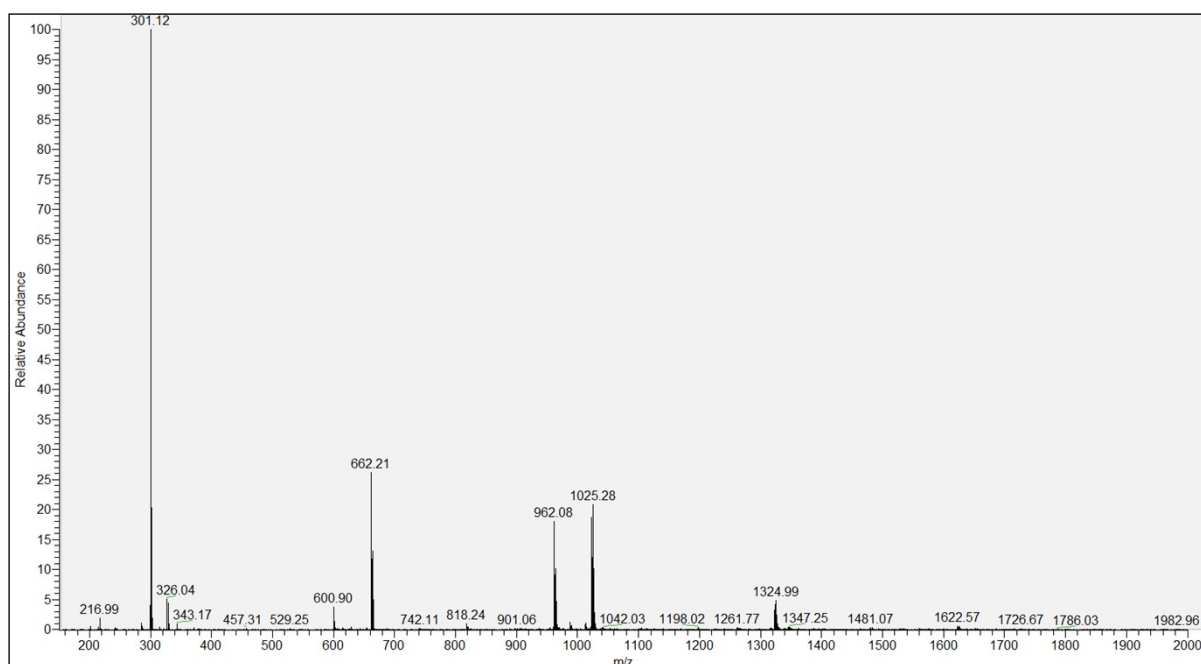

Figure S29. ESI-MS spectra of  $[\text{Cu}(\text{L}^2)_2]$ .

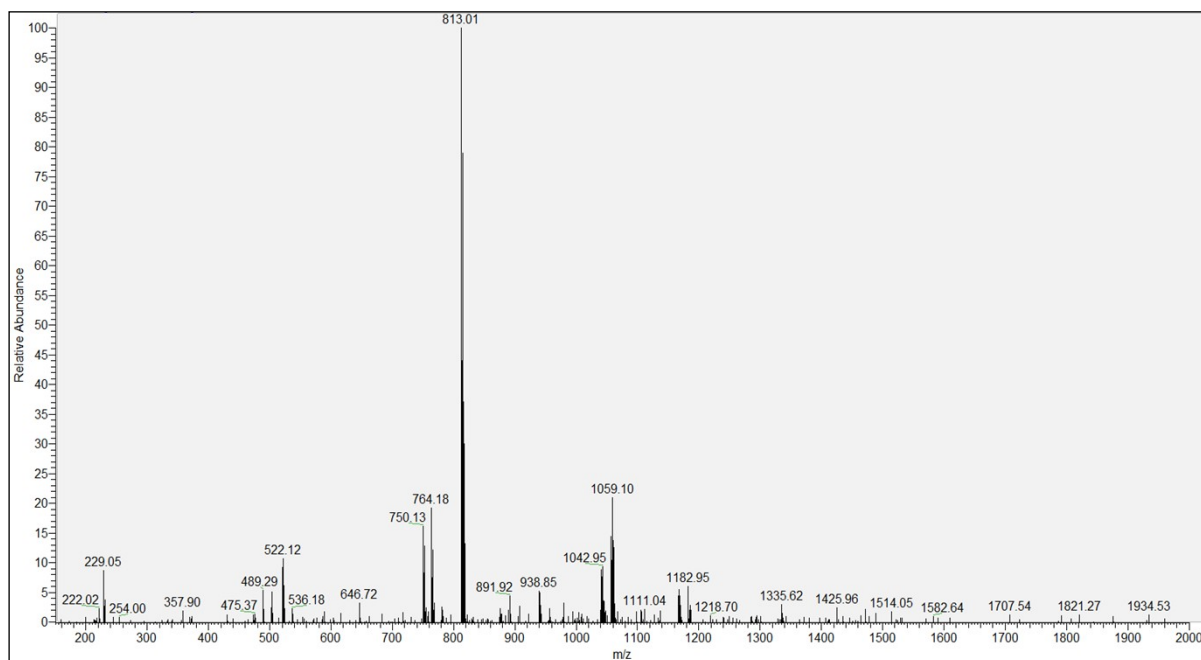

Figure S30. ESI-MS spectra of  $[\text{Cu}(\text{L}^3)_2]$ .



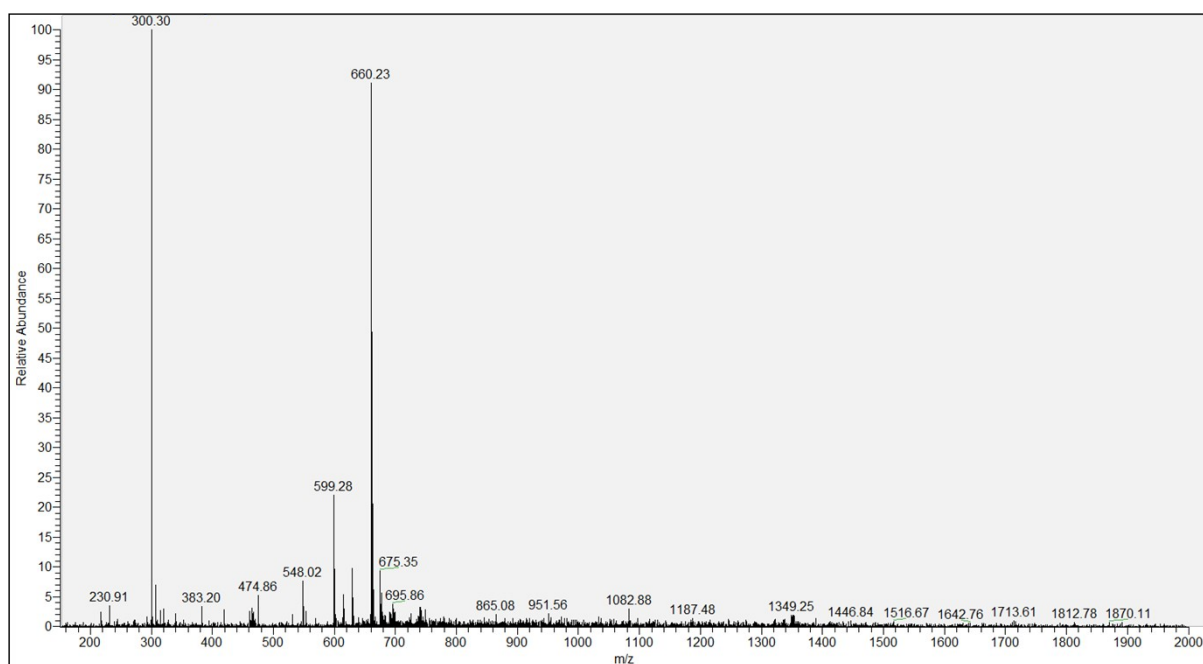

Figure S31. ESI-MS spectra of  $[\text{Cu}(\text{L}^4)]$ .

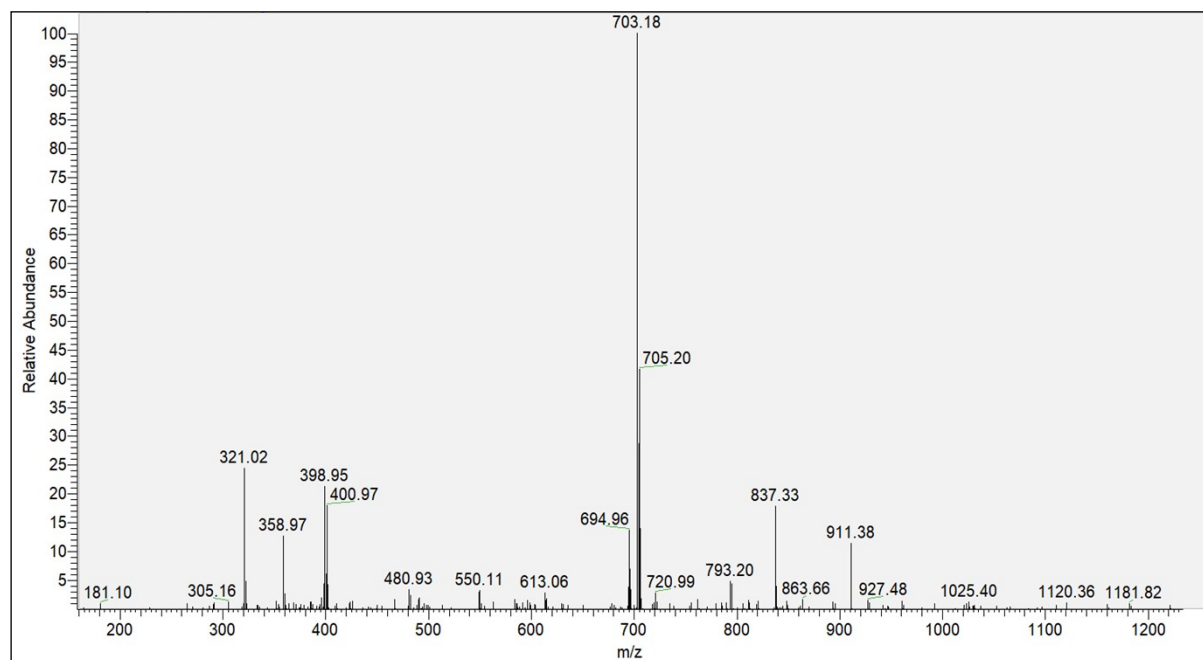

Figure S32. ESI-MS spectra of  $[\text{CuBr}(\text{a}^1)]$ .

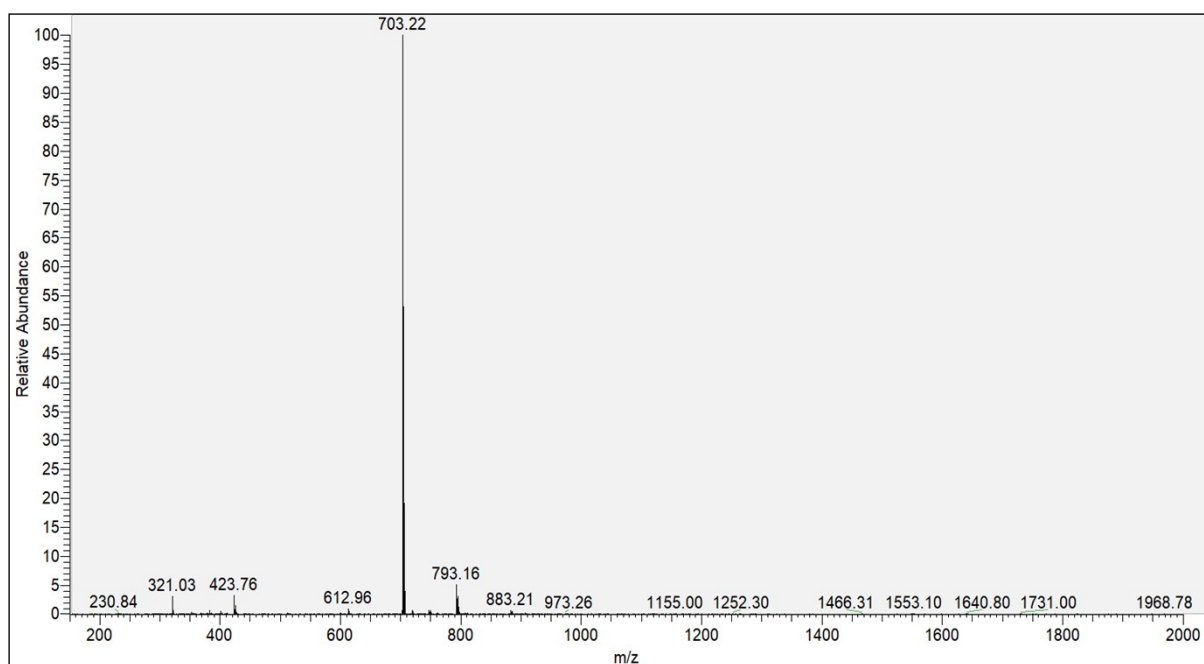

Figure S33. ESI-MS spectra of  $[\text{Cu}(\text{a}^1)_2]\text{PF}_6$ .

## 7. FT-IR spectra

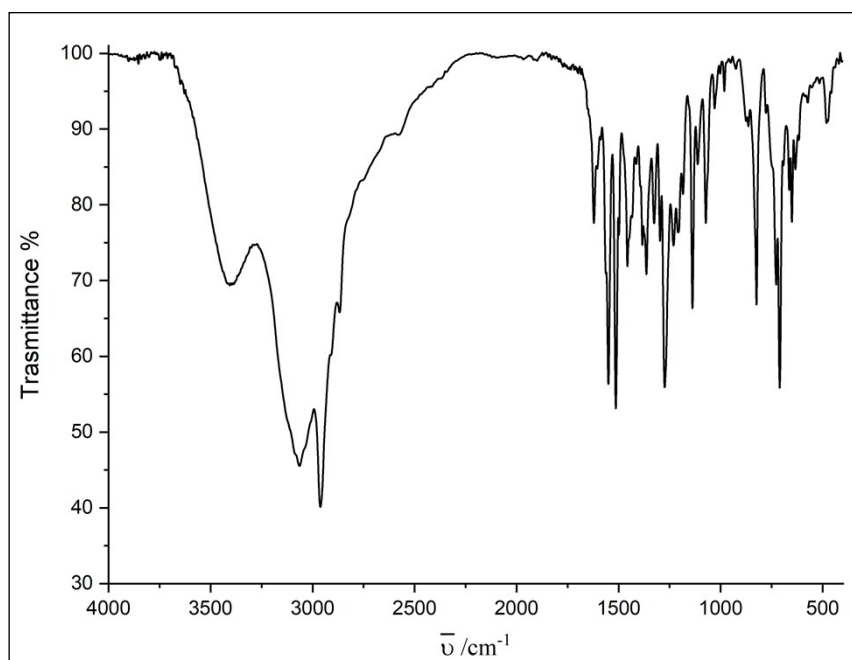

Figure S34. FT-IR spectra of  $\text{Ha}^1\text{Br}$ .

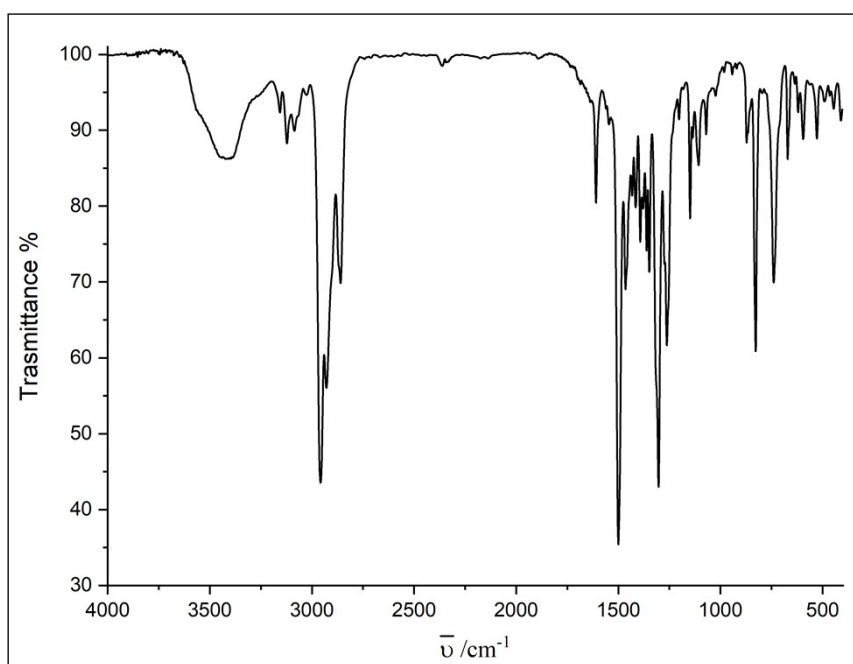

Figure S35. FT-IR spectra of [Cu(L<sup>1</sup>)<sub>2</sub>].

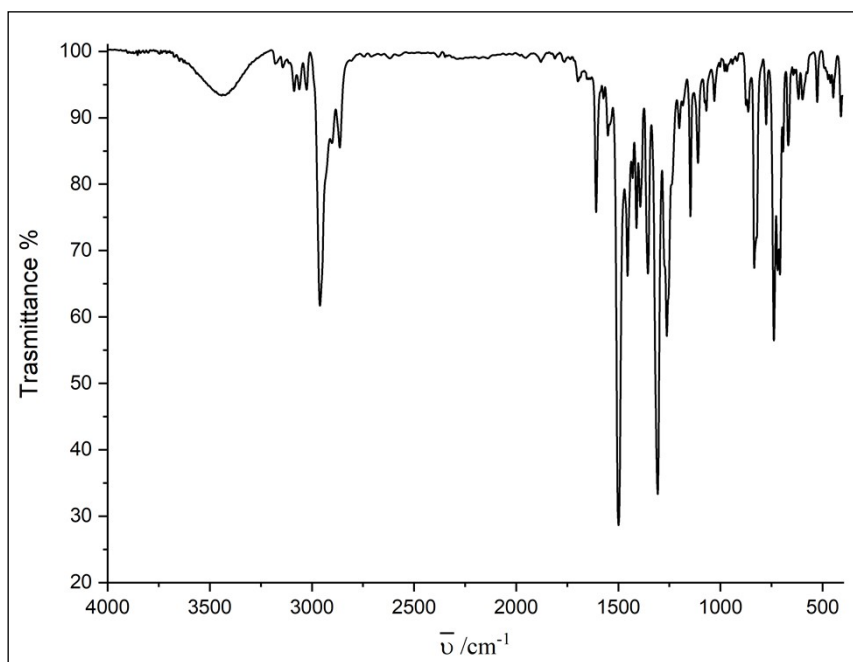

Figure S36. FT-IR spectra of [Cu(L<sup>2</sup>)<sub>2</sub>].

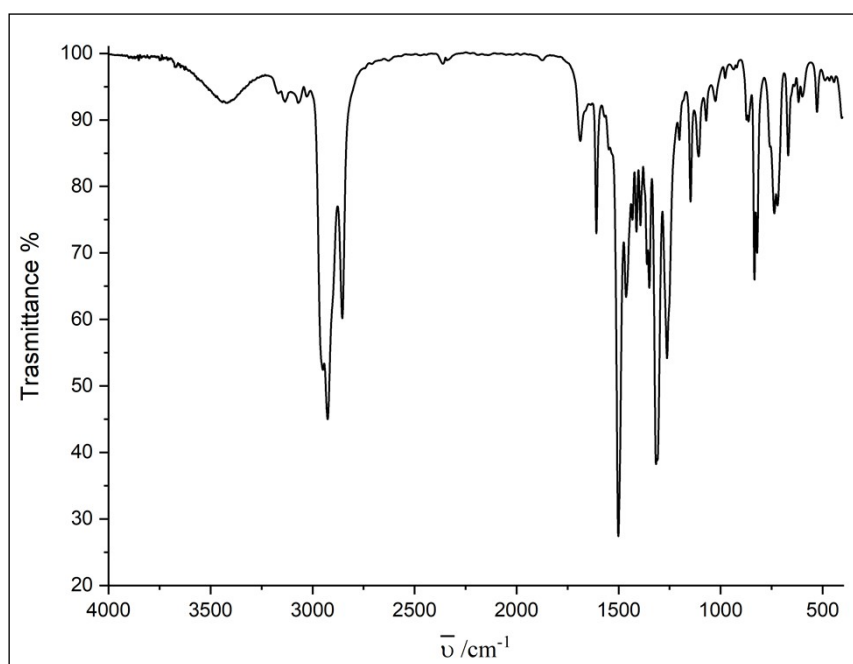

Figure S37. FT-IR spectra of [Cu(L<sup>3</sup>)<sub>2</sub>].

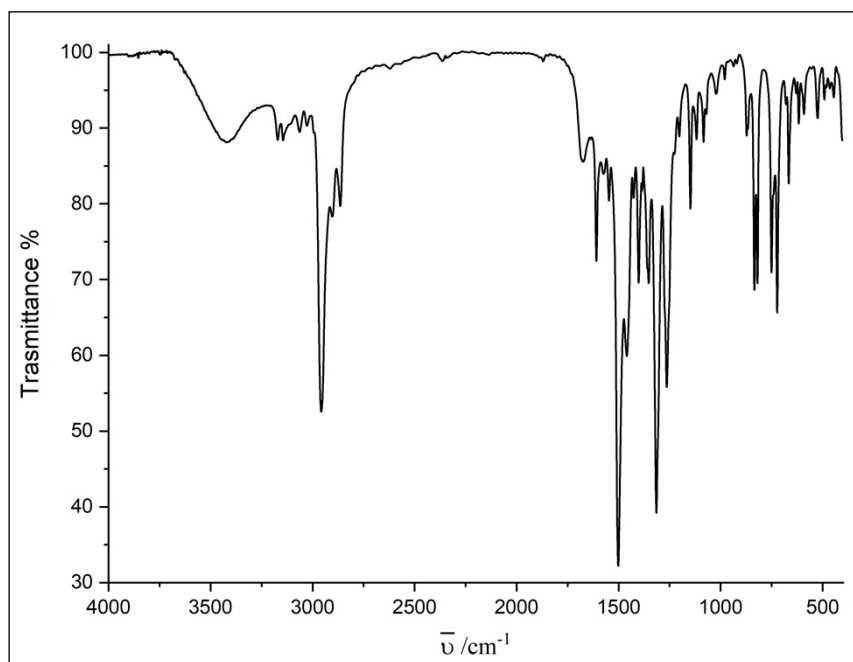

Figure S38. FT-IR spectra of [Cu(L<sup>4</sup>)].

## 8. UV-Vis spectra

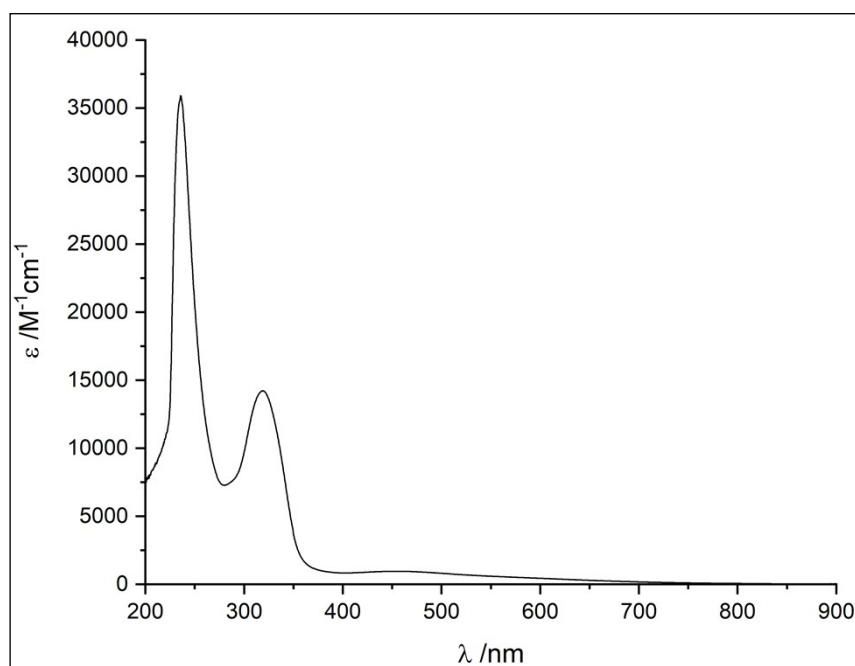

Figure S39. UV-Vis absorption spectra of [Cu(L<sup>1</sup>)<sub>2</sub>] in dichloromethane.

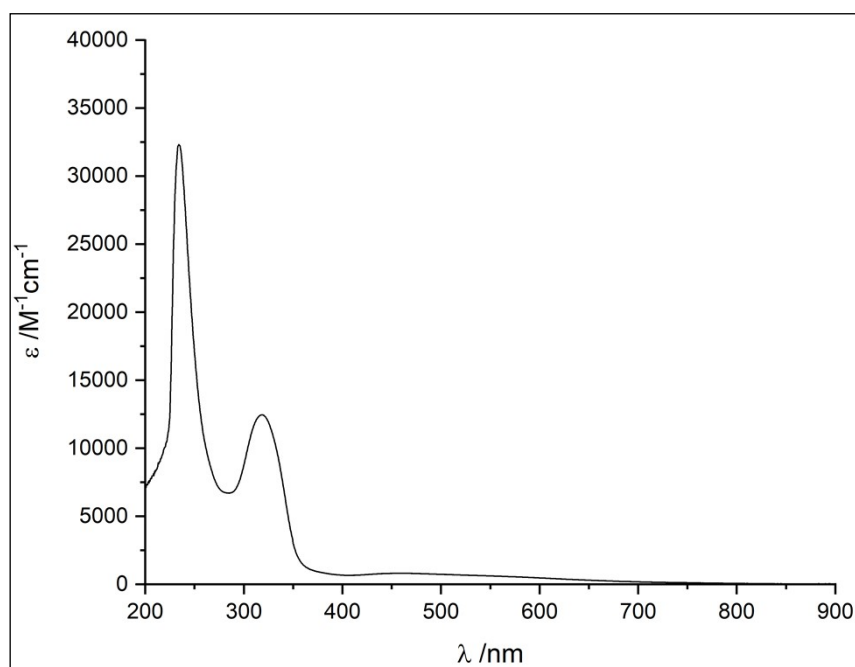

Figure S40. UV-Vis absorption spectra of [Cu(L<sup>2</sup>)<sub>2</sub>] in dichloromethane.

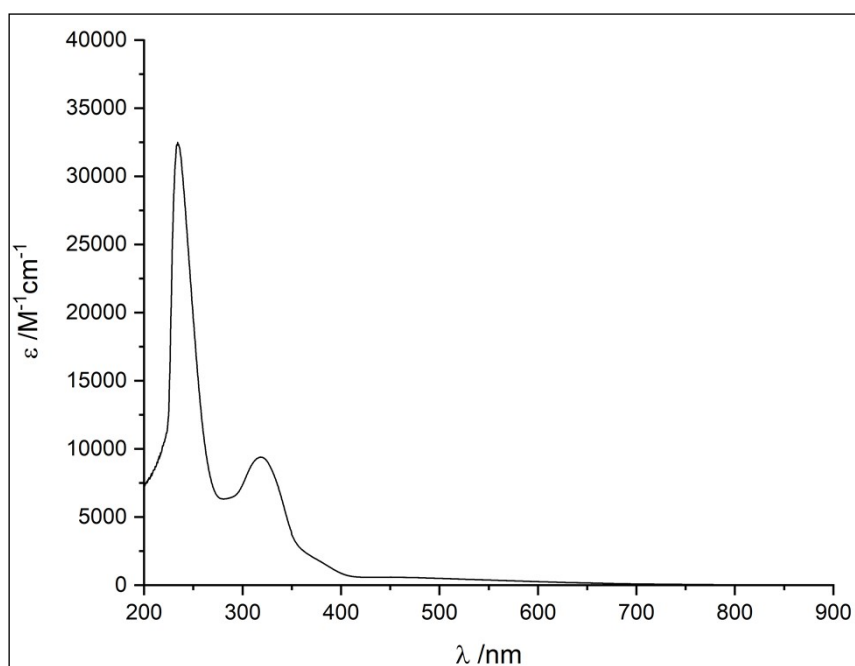

Figure S41. UV-Vis absorption spectra of  $[\text{Cu}(\text{L}^3)_2]$  in dichloromethane.

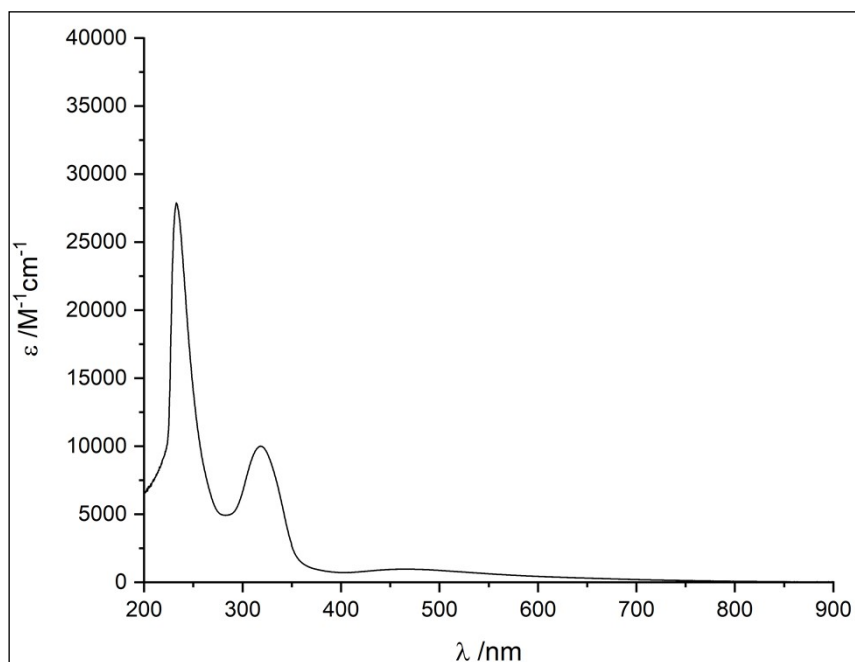

Figure S42. UV-Vis absorption spectra of  $[\text{Cu}(\text{L}^4)]$  in dichloromethane.

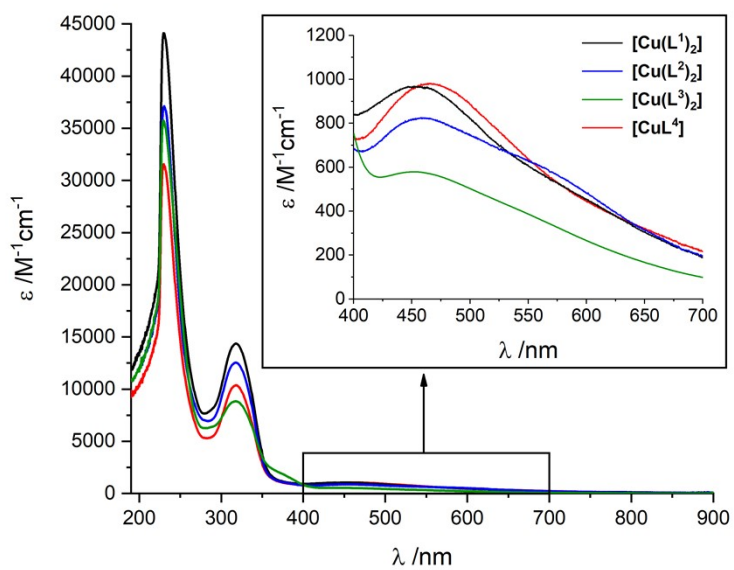

Figure S43. UV-vis. absorption spectra of the reported copper(II) complexes in dichlorometane.

## 9. SC-XRD data

**Table S1:** Crystallographic details for complex [Cu(L<sup>1</sup>)<sub>2</sub>] and [CuBr(a<sup>1</sup>)].

|                                             | [Cu(L <sup>1</sup> ) <sub>2</sub> ]                             | [CuBr(a <sup>1</sup> )]                                       |
|---------------------------------------------|-----------------------------------------------------------------|---------------------------------------------------------------|
| Empirical formula                           | C <sub>40</sub> H <sub>42</sub> CuN <sub>4</sub> O <sub>2</sub> | C <sub>21</sub> H <sub>24</sub> BrCuN <sub>2</sub> O          |
| Formula weight                              | 674.31                                                          | 463.87                                                        |
| Temperature /K                              | 200(2)                                                          | 301(2)                                                        |
| Crystal system                              | monoclinic                                                      | monoclinic                                                    |
| Space group                                 | P2 <sub>1</sub>                                                 | Cc                                                            |
| a/Å                                         | 10.9603(2)                                                      | 15.9866(3)                                                    |
| b/Å                                         | 10.4001(2)                                                      | 12.9150(3)                                                    |
| c/Å                                         | 14.9309(3)                                                      | 10.0896(2)                                                    |
| α/°                                         | 90                                                              | 90                                                            |
| β/°                                         | 98.830(2)                                                       | 91.323(2)                                                     |
| γ/°                                         | 90                                                              | 90                                                            |
| Volume/Å <sup>3</sup>                       | 1681.78(6)                                                      | 2082.61(7)                                                    |
| Z                                           | 2                                                               | 4                                                             |
| ρ <sub>calc</sub> /cm <sup>3</sup>          | 1.332                                                           | 1.479                                                         |
| μ/mm <sup>-1</sup>                          | 0.691                                                           | 3.807                                                         |
| F(000)                                      | 710.0                                                           | 944.0                                                         |
| Crystal size/mm <sup>3</sup>                | 0.18 x 0.17 x 0.15                                              | 0.12 x 0.11 x 0.10                                            |
| Radiation                                   | MoKα (λ = 0.71073)                                              | CuKα (λ = 1.54184)                                            |
| 2θ range for data collection/°              | 3.76 to 51.354                                                  | 12.344 to 144.242                                             |
| Index ranges                                | -13 ≤ h ≤ 13, -12 ≤ k ≤ 12, -18 ≤ l ≤ 18                        | -19 ≤ h ≤ 19, -15 ≤ k ≤ 15, -12 ≤ l ≤ 12                      |
| Reflections collected                       | 73871                                                           | 27598                                                         |
| Independent reflections                     | 6396 [R <sub>int</sub> = 0.0665, R <sub>sigma</sub> = 0.0260]   | 4015 [R <sub>int</sub> = 0.0427, R <sub>sigma</sub> = 0.0221] |
| Data/restraints/parameters                  | 6396/1/430                                                      | 4015/2/239                                                    |
| Goodness-of-fit on F <sup>2</sup>           | 1.035                                                           | 1.000                                                         |
| Final R indexes [I >= 2σ (I)]               | R <sub>1</sub> = 0.0259, wR <sub>2</sub> = 0.0655               | R <sub>1</sub> = 0.0386, wR <sub>2</sub> = 0.1158             |
| Final R indexes [all data]                  | R <sub>1</sub> = 0.0271, wR <sub>2</sub> = 0.0666               | R <sub>1</sub> = 0.0404, wR <sub>2</sub> = 0.1189             |
| Largest diff. peak/hole / e Å <sup>-3</sup> | 0.18/-0.33                                                      | 0.69/-0.37                                                    |
| CCDC number                                 | 2371863                                                         | 2371864                                                       |

$R_1 = (\sum ||F_o| - |F_c|| / \sum |F_o|)$ ;  $wR_2 = \{\sum [w(F_o^2 - F_c^2)^2] / \sum [w(F_o^2)^2]\}^{1/2}$ ;  $GOF = \{\sum [w(F_o^2 - F_c^2)^2] / (n - p)\}^{1/2}$  where  $n$  is the number of data and  $p$  is the number of parameters refined.



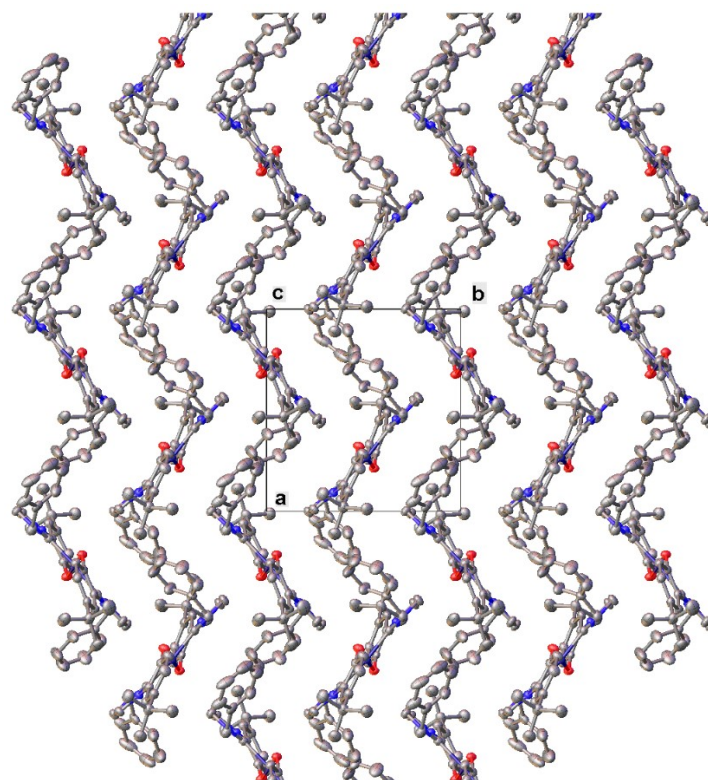

Figure S44. ORTEP representation of the crystal packing of complex  $[\text{Cu}(\text{L}^1)_2]$  (view along  $c$  axis).

## 10. Catalysis

The yield determination of the catalytic tests was conducted registering the  $^1\text{H}$  NMR spectra of the reaction mixture in  $\text{CDCl}_3$ , after addition of 0.5 equivalents of an 2,5-dimethylfuran as internal standard. Using the benchmark substrate *N*-ethylaniline, the yields of *N*-ethylformaniline and *N*-methyl-*N*-ethylaniline were calculated using the integral of the signals at 8.35 and 2.90 ppm respectively (Fig. S45). The unreacted *N*-ethylaniline amount was estimated from the integral of the quartet at 3.15 ppm. The residual silane amount was instead calculated on the Si-H signal integral, at 4.20 ppm for the phenylsilane. The integrals values were referred to the CH proton signal of the internal standard 2,5-dimethylfuran, to have accurate estimations. In all the catalytic tests reported, no loss of matter was observed.

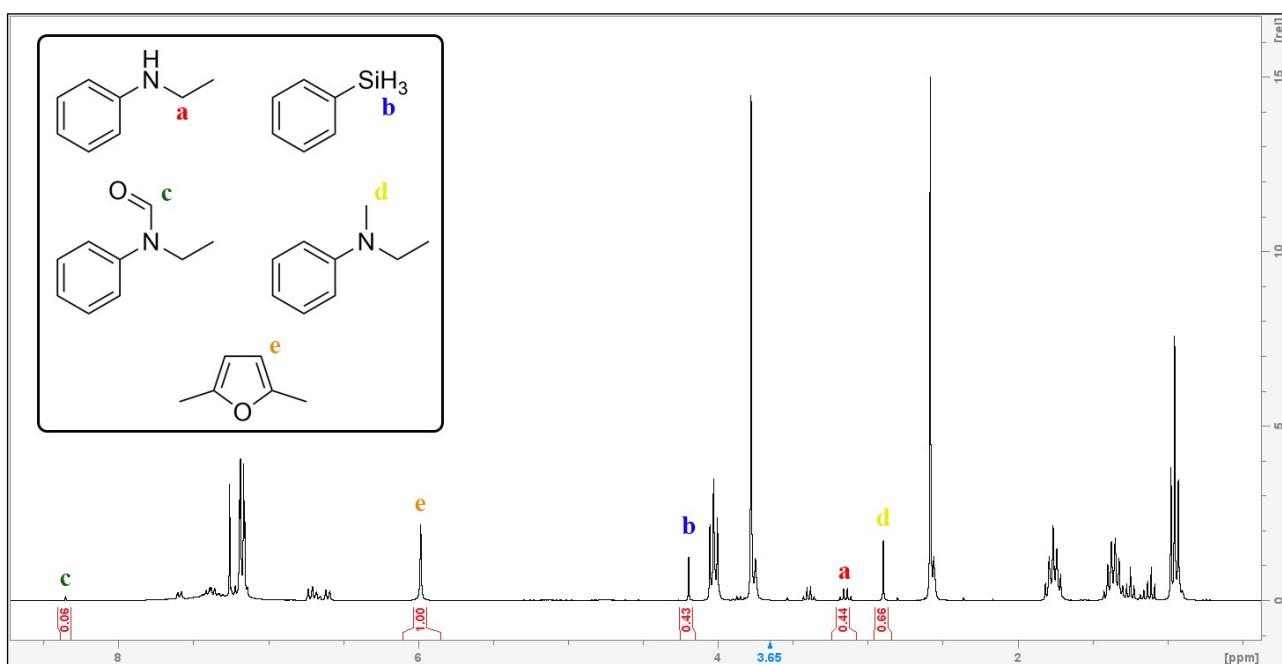

Figure S45.  $^1\text{H}$  NMR spectrum in  $\text{CDCl}_3$  of a generic catalytic reaction using *N*-ethylaniline as substrate, phenylsilane as reducing agent, and  $[\text{BMMIM}][\text{NTf}_2]$  as solvent.

<sup>1</sup>H NMR chemical shifts for the quantification of the compounds:

***N*-ethylaniline (1a)** <sup>[1]</sup> <sup>1</sup>H NMR (400 MHz, CDCl<sub>3</sub>): δ = 7.24–7.10 (m, 2H), 6.76–6.64 (m, 1H), 6.64–6.52 (m, 2H), 3.49 (s, 1H), 3.13 (q, *J* = 7.1 Hz, 2H), 1.23 (t, *J* = 7.1 Hz, 3H) ppm.

***N*-ethylformanilide (3a)** <sup>[2]</sup> <sup>1</sup>H NMR (500 MHz, CDCl<sub>3</sub>): δ = 8.35 (s, 1H), 7.40 (t, *J* = 8.0 Hz, 2H), 7.29 (t, *J* = 7.5 Hz, 1H), 7.16 (d, *J* = 7.5 Hz, 2H), 3.85 (q, *J* = 7.0 Hz, 2H), 1.15 (t, *J* = 7.0 Hz, 3H) ppm.

***N*-methyl-*N*-ethylaniline (2a)** <sup>[3]</sup> <sup>1</sup>H NMR (600 MHz, CDCl<sub>3</sub>): δ = 7.22 (t, *J* = 7.8 Hz, 2H), 6.72 (d, *J* = 8.3 Hz, 2H), 6.68 (t, *J* = 7.2 Hz, 1H), 3.39 (q, *J* = 7.1 Hz, 2H), 2.89 (s, 3H), 1.11 (t, *J* = 7.1 Hz, 3H) ppm.

***N*-methylaniline (1b)** <sup>[1]</sup> <sup>1</sup>H NMR (400 MHz, CDCl<sub>3</sub>): δ = 7.39–7.02 (m, 2H), 6.70 (tt, *J* = 7.3, 1.1 Hz, 1H), 6.64–6.55 (m, 2H), 3.66 (s, 1H), 2.81 (s, 3H) ppm.

***N*-methylformanilide (3b)** <sup>[2]</sup> <sup>1</sup>H NMR (400 MHz, CDCl<sub>3</sub>): δ = 8.52 (s, 1H), 7.46 (t, *J* = 7.6 Hz, 2H), 7.32 (t, *J* = 7.6 Hz, 1H), 7.21 (d, *J* = 7.2 Hz, 2H), 3.36 (s, 3H) ppm.

***N,N*-dimethyl-aniline (2b)** <sup>[3]</sup> <sup>1</sup>H NMR (600 MHz, CDCl<sub>3</sub>): δ = 7.27 (t, *J* = 7.7 Hz, 2H), 6.76 (dd, *J* = 17.4, 7.9 Hz, 3H), 2.97 (s, 6H) ppm.

**4-methoxy-*N*-methylaniline (1c)** <sup>[1]</sup> <sup>1</sup>H NMR (400 MHz, CDCl<sub>3</sub>): δ = 6.80 (d, *J* = 8.9 Hz, 2H), 6.58 (d, *J* = 8.9 Hz, 2H), 3.75 (s, 3H), 2.80 (s, 3H) ppm.

***N*-(4-methoxyphenyl)-*N*-methylformamide (3c)** <sup>[4]</sup> <sup>1</sup>H NMR (400 MHz, CDCl<sub>3</sub>): δ = 8.34 (s, 1H), 7.10 (d, *J* = 9.2 Hz, 2H), 6.93 (d, *J* = 8.0 Hz, 2H), 3.82 (s, 3H), 3.27 (s, 3H) ppm.

**4,4-*N,N*-dimethylaminoanisole (2c)** <sup>[5]</sup> <sup>1</sup>H NMR (400 MHz, CDCl<sub>3</sub>): δ = 6.84 (d, *J* = 8.6 Hz, 2H), 6.75 (d, *J* = 8.9 Hz, 2H), 2.86 (s, 6H), 3.76 (s, 3H) ppm.

**Dibenzylamine (1d)** <sup>[6]</sup> <sup>1</sup>H NMR (500 MHz, CDCl<sub>3</sub>): δ = 7.26–7.22 (m, 4H), 7.19–7.14 (m, 4H), 3.72 (s, 4H) ppm.

***N,N*-dibenzylformamide (3d)** <sup>[7]</sup> <sup>1</sup>H NMR (400 MHz, CDCl<sub>3</sub>): δ = 8.35 (s, 1H), 7.35 – 7.22 (m, 6H), 7.14 (m, 4H), 4.36 (s, 2H), 4.19 (s, 2H) ppm.

***N,N*-dibenzyl-methylamine (2d)** <sup>[8]</sup> <sup>1</sup>H NMR (400 MHz, CDCl<sub>3</sub>): δ = 7.37–7.29 (m, 8H), 7.25–7.21 (m, 2H), 3.51 (s, 4H), 2.18 (s, 3H) ppm.

**Table S2**

Preliminary catalytic experiments in the N-methylation and N-formylation of *N*-ethylaniline with CO<sub>2</sub> and phenylsilane.

| Entry | Catalyst                               | Solvent                    | p /<br>bar | t /h | Conv.<br>/% <sup>a</sup> | <b>2a</b> /% <sup>a</sup> | <b>3a</b> /% <sup>a</sup> |
|-------|----------------------------------------|----------------------------|------------|------|--------------------------|---------------------------|---------------------------|
| 1     | -                                      | Acetonitrile               | 5          | 5    | 0                        | 0                         | 0                         |
| 2     | H <sub>2</sub> L <sup>1</sup> Br       | Acetonitrile               | 5          | 5    | 0                        | 0                         | 0                         |
| 3     | Cu(OAc) <sub>2</sub> ·H <sub>2</sub> O | Acetonitrile               | 5          | 5    | 0                        | 0                         | 0                         |
| 4     | [Cu(L <sup>1</sup> ) <sub>2</sub> ]    | Acetonitrile               | 5          | 5    | 87                       | 8                         | 79                        |
| 5     | [Cu(L <sup>1</sup> ) <sub>2</sub> ]    | Acetonitrile               | 3          | 5    | 65                       | 7                         | 58                        |
| 6     | [Cu(L <sup>1</sup> ) <sub>2</sub> ]    | Toluene                    | 3          | 5    | 0                        | 0                         | 0                         |
| 7     | [Cu(L <sup>1</sup> ) <sub>2</sub> ]    | Methanol                   | 3          | 5    | 0                        | 0                         | 0                         |
| 8     | [Cu(L <sup>1</sup> ) <sub>2</sub> ]    | Acetone                    | 3          | 5    | 12                       | 2                         | 10                        |
| 9     | [Cu(L <sup>1</sup> ) <sub>2</sub> ]    | DMF                        | 3          | 5    | >99                      | 23                        | 77                        |
| 10    | [Cu(L <sup>1</sup> ) <sub>2</sub> ]    | [BMMIM][NTf <sub>2</sub> ] | 3          | 5    | >99                      | 30                        | 70                        |
| 11    | -                                      | [BMMIM][NTf <sub>2</sub> ] | 3          | 16   | 0                        | 0                         | 0                         |

Reaction conditions: *N*-ethylaniline 0.40 mmol, PhSiH<sub>3</sub> (3 eq), catalyst load 1 mol%, 40 °C, 19 h, in 1 mL of solvent.

<sup>a</sup> Yield determined by <sup>1</sup>H NMR using 2,5-dimethylfuran as an internal standard.

**Table S3**

Catalytic experiments in the N-methylation and N-formylation of *N*-ethylaniline with CO<sub>2</sub> and phenylsilane with different Cu(II) complexes..

| Entry           | Catalyst                            | Time /h | Conv. /% <sup>a</sup> | <b>2a</b> /% <sup>a</sup> | <b>3a</b> /% <sup>a</sup> |
|-----------------|-------------------------------------|---------|-----------------------|---------------------------|---------------------------|
| 1               | [Cu(L <sup>1</sup> ) <sub>2</sub> ] | 1       | 5                     | 3                         | 2                         |
| 2               | [Cu(L <sup>1</sup> ) <sub>2</sub> ] | 3       | 21                    | 15                        | 6                         |
| 3               | [Cu(L <sup>1</sup> ) <sub>2</sub> ] | 5       | 35                    | 24                        | 11                        |
| 4               | [Cu(L <sup>1</sup> ) <sub>2</sub> ] | 7       | 43                    | 29                        | 14                        |
| 5               | [Cu(L <sup>1</sup> ) <sub>2</sub> ] | 24      | 84                    | 62                        | 22                        |
| 6               | [Cu(L <sup>1</sup> ) <sub>2</sub> ] | 30      | 89                    | 64                        | 25                        |
| 7 <sup>b</sup>  | [Cu(L <sup>1</sup> ) <sub>2</sub> ] | 30 + 16 | 100                   | 75                        | 25                        |
| 8               | [Cu(L <sup>2</sup> ) <sub>2</sub> ] | 1       | 6                     | 5                         | 1                         |
| 9               | [Cu(L <sup>2</sup> ) <sub>2</sub> ] | 3       | 34                    | 24                        | 10                        |
| 10              | [Cu(L <sup>2</sup> ) <sub>2</sub> ] | 5       | 65                    | 49                        | 16                        |
| 11              | [Cu(L <sup>2</sup> ) <sub>2</sub> ] | 7       | 84                    | 64                        | 20                        |
| 12              | [Cu(L <sup>2</sup> ) <sub>2</sub> ] | 24      | 100                   | 81                        | 19                        |
| 13              | [Cu(L <sup>3</sup> ) <sub>2</sub> ] | 1       | 5                     | 3                         | 2                         |
| 14              | [Cu(L <sup>3</sup> ) <sub>2</sub> ] | 3       | 14                    | 9                         | 5                         |
| 15              | [Cu(L <sup>3</sup> ) <sub>2</sub> ] | 5       | 19                    | 12                        | 7                         |
| 16              | [Cu(L <sup>3</sup> ) <sub>2</sub> ] | 7       | 22                    | 15                        | 7                         |
| 17              | [Cu(L <sup>3</sup> ) <sub>2</sub> ] | 24      | 29                    | 15                        | 14                        |
| 18              | [Cu(L <sup>4</sup> )]               | 1       | 1                     | 1                         | 0                         |
| 19              | [Cu(L <sup>4</sup> )]               | 3       | 9                     | 7                         | 2                         |
| 20              | [Cu(L <sup>4</sup> )]               | 5       | 17                    | 14                        | 3                         |
| 21              | [Cu(L <sup>4</sup> )]               | 7       | 19                    | 15                        | 5                         |
| 22              | [Cu(L <sup>4</sup> )]               | 24      | 20                    | 15                        | 5                         |
| 23 <sup>c</sup> | [Cu(L <sup>2</sup> ) <sub>2</sub> ] | 1       | 21                    | 19                        | 2                         |
| 24 <sup>c</sup> | [Cu(L <sup>2</sup> ) <sub>2</sub> ] | 3       | 41                    | 37                        | 4                         |
| 25 <sup>c</sup> | [Cu(L <sup>2</sup> ) <sub>2</sub> ] | 5       | 48                    | 43                        | 5                         |
| 26 <sup>c</sup> | [Cu(L <sup>2</sup> ) <sub>2</sub> ] | 24      | 68                    | 59                        | 9                         |

Reaction conditions: *N*-ethylaniline 0.40 mmol, PhSiH<sub>3</sub> (3 eq), catalyst load 1 mol%, p(CO<sub>2</sub>) = 1 bar (balloon), 60 °C, in 1 mL of [BMMIM][NTf<sub>2</sub>]. <sup>a</sup> Yield determined by <sup>1</sup>H NMR using 2,5-dimethylfuran as an internal standard. <sup>b</sup> Addition of 3 eq of phenylsilane. <sup>c</sup> T = 80 °C.

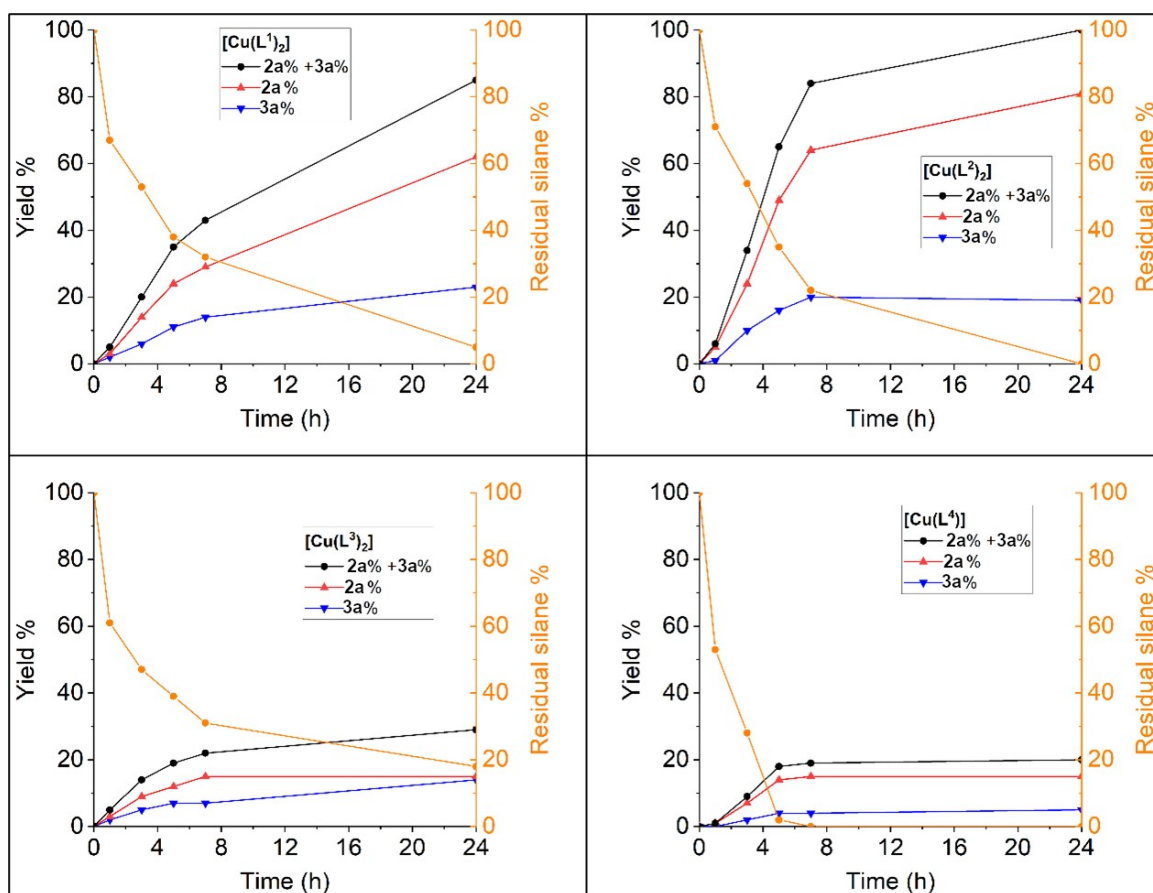

Figure S46a. Yield of *N*-methyl-*N*-ethylaniline (**2a**), *N*-ethylformanilide (**3a**), sum of the yields and residual phenylsilane against time for the reaction involving the four Cu(II) complexes (data of table S3). *N*-ethylaniline 0.40 mmol, PhSiH<sub>3</sub> (3 eq), catalyst load 1 mol%, p(CO<sub>2</sub>) = 1 bar, 60 °C.

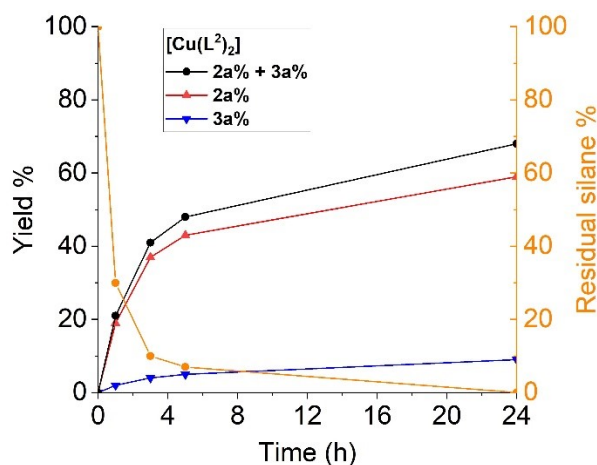

Figure S46b. Yield of *N*-methyl-*N*-ethylaniline (**2a**), *N*-ethylformanilide (**3a**), sum of the yields and residual phenylsilane against time for the reaction involving [Cu(L<sup>2</sup>)<sub>2</sub>] (data of table S3). *N*-ethylaniline 0.40 mmol, PhSiH<sub>3</sub> (3 eq), catalyst load 1 mol%, p(CO<sub>2</sub>) = 1 bar, 80 °C.

## 11. Stoichiometric reactions NMR spectra

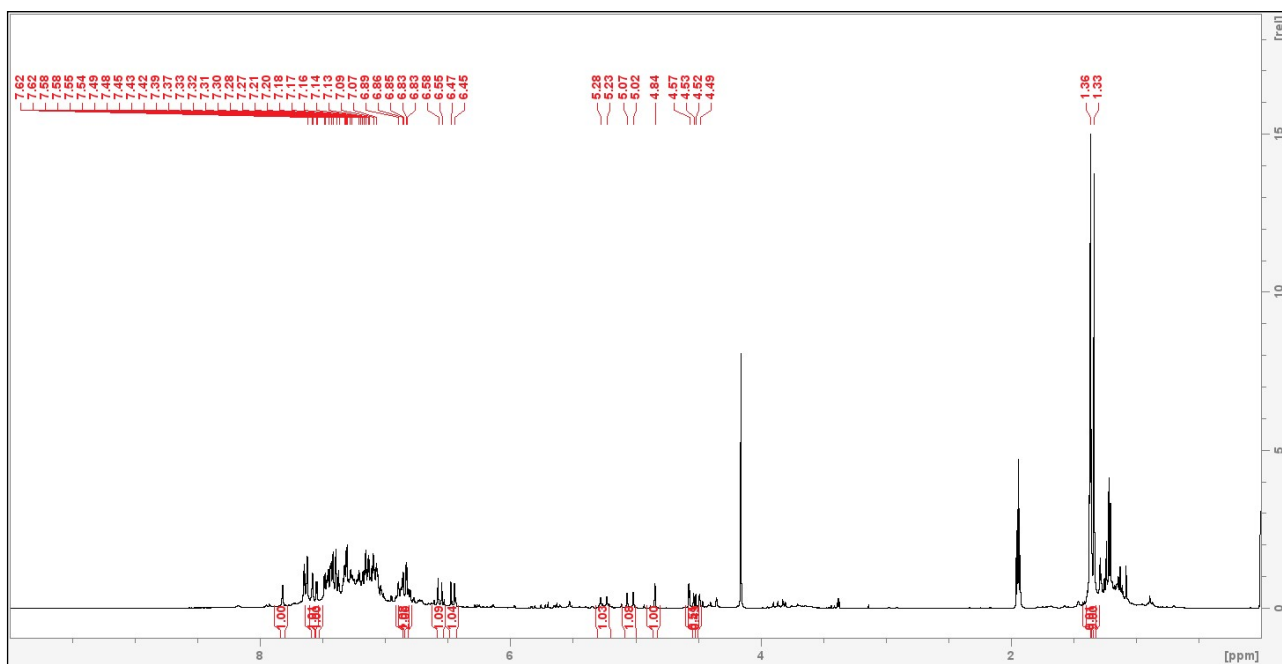

Figure S47.  $^1\text{H}$  NMR spectra of the reaction between  $[\text{Cu}(\text{L}^1)_2]$  and  $\text{PhSiH}_3$ , in  $\text{CD}_3\text{CN}$ .

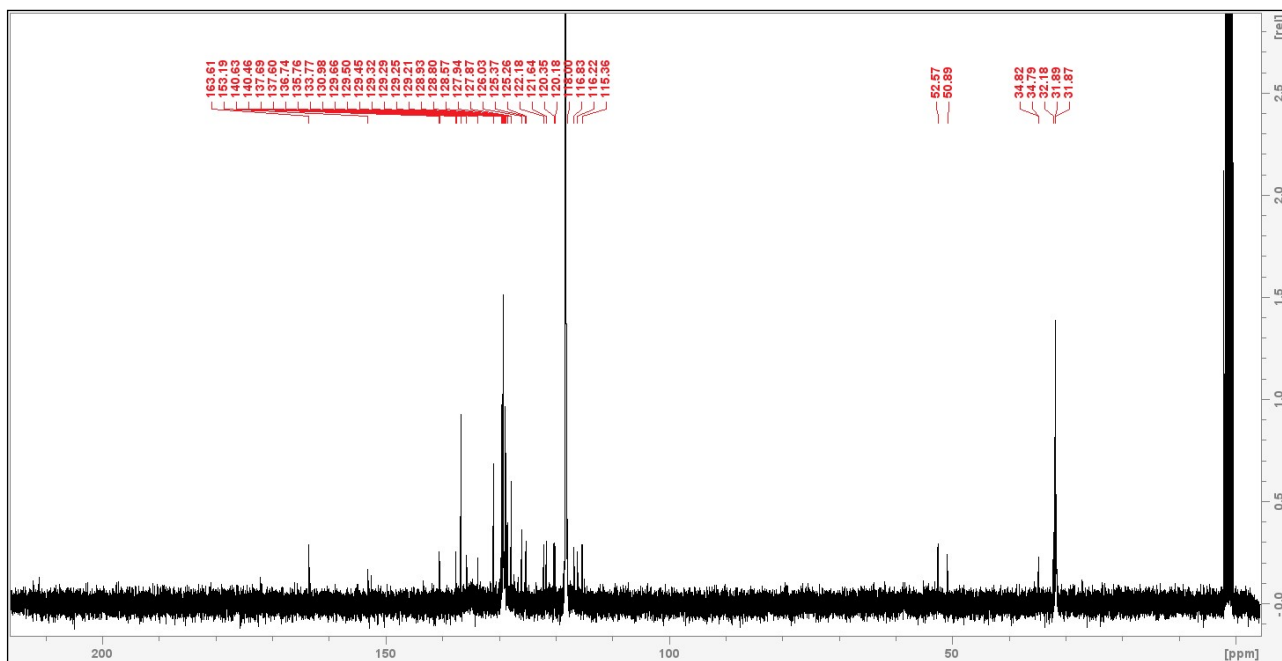

Figure S48.  $^{13}\text{C}$  NMR spectra of the reaction between  $[\text{Cu}(\text{L}^1)_2]$  and  $\text{PhSiH}_3$ , in  $\text{CD}_3\text{CN}$ .

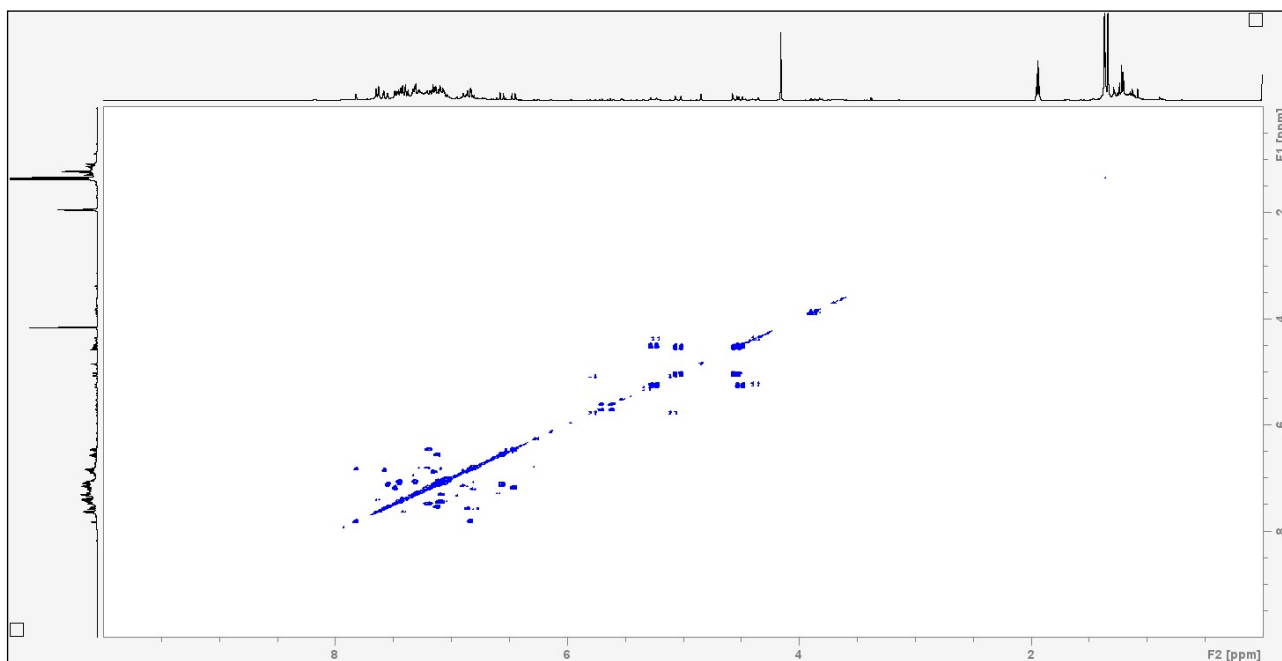

Figure S49. 2D NMR COSY <sup>1</sup>H–<sup>1</sup>H spectra of the reaction between [Cu(L<sup>1</sup>)<sub>2</sub>] and PhSiH<sub>3</sub>, in CD<sub>3</sub>CN.

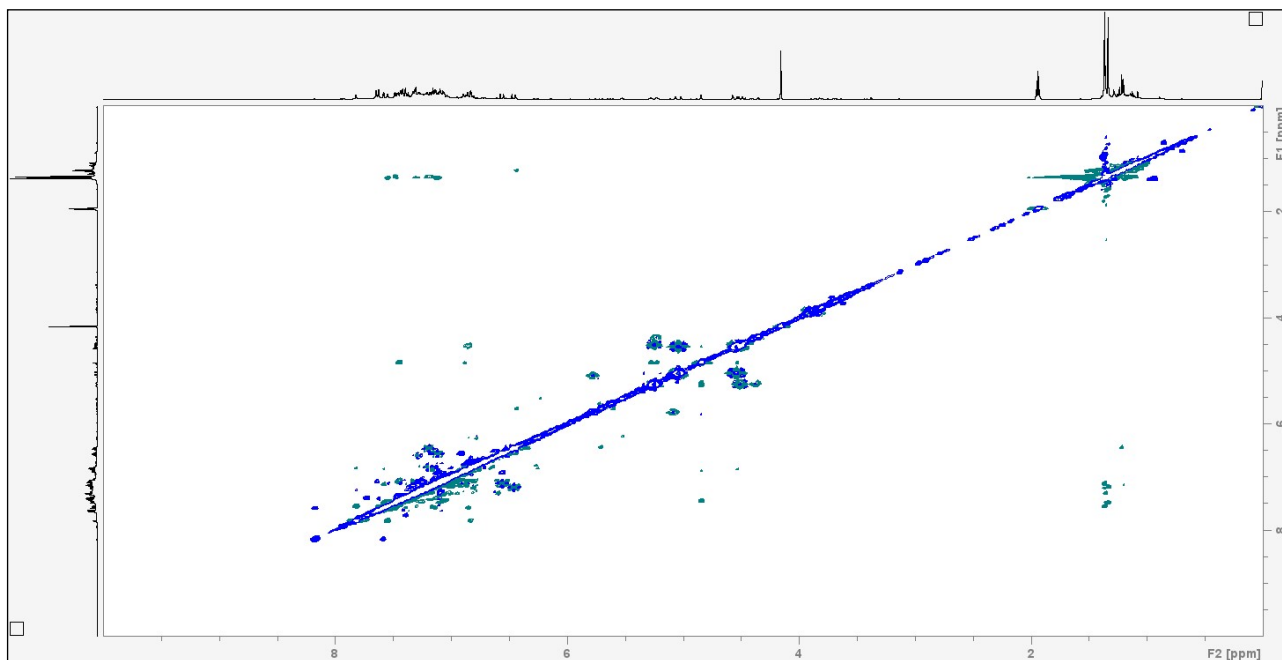

Figure S50. 2D NMR NOE <sup>1</sup>H–<sup>1</sup>H spectra of the reaction between [Cu(L<sup>1</sup>)<sub>2</sub>] and PhSiH<sub>3</sub>, in CD<sub>3</sub>CN.



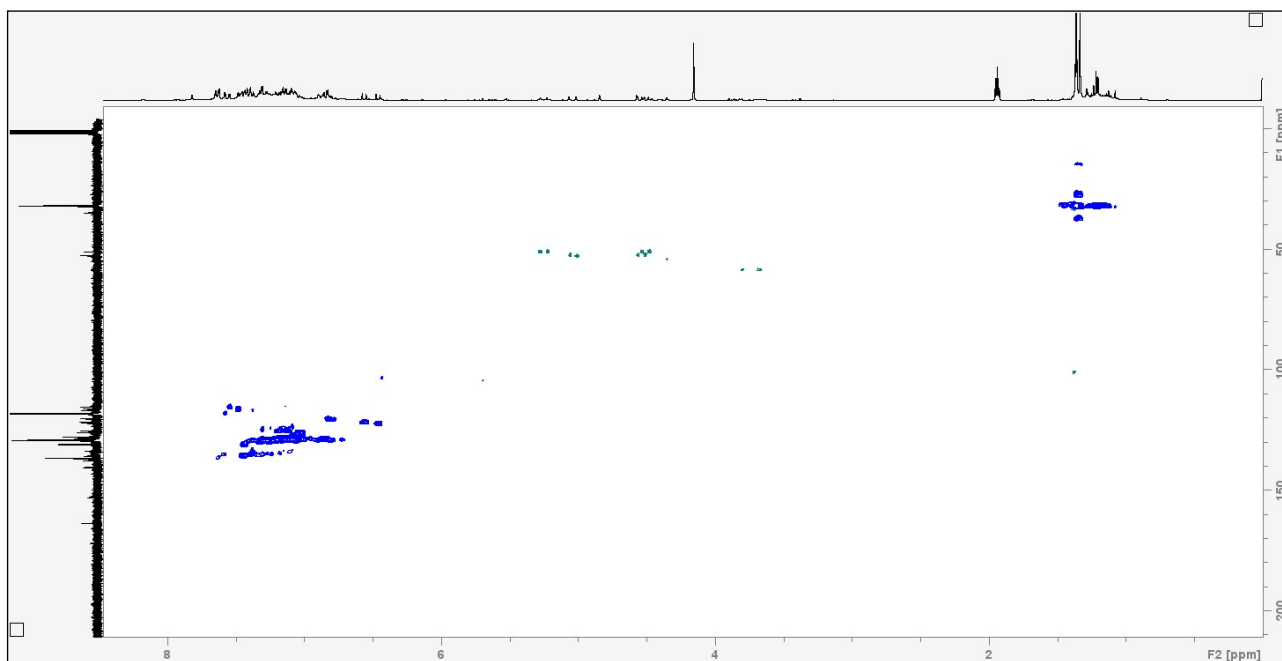

Figure S51. 2D NMR HSQC INEPT  $^{13}\text{C}$ - $^1\text{H}$  spectra of the reaction between  $[\text{Cu}(\text{L}^1)_2]$  and  $\text{PhSiH}_3$ , in  $\text{CD}_3\text{CN}$ .

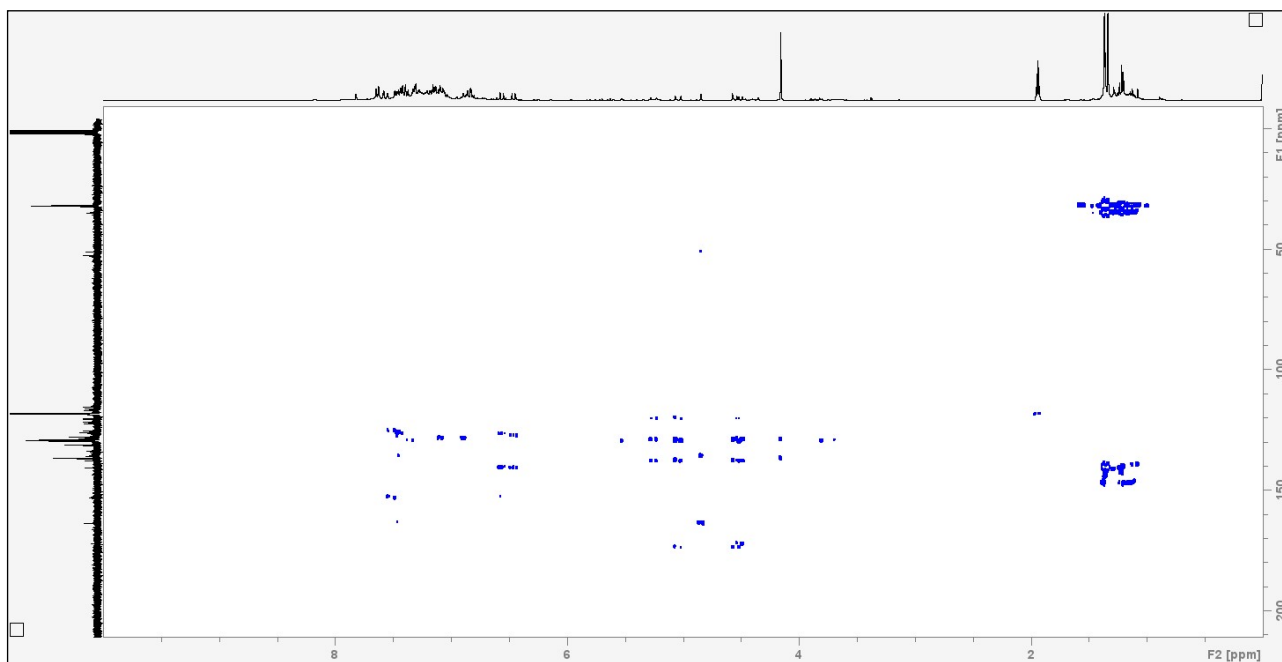

Figure S52. 2D NMR HMBC  $^{13}\text{C}$ - $^1\text{H}$  spectra of the reaction between  $[\text{Cu}(\text{L}^1)_2]$  and  $\text{PhSiH}_3$ , in  $\text{CD}_3\text{CN}$ .

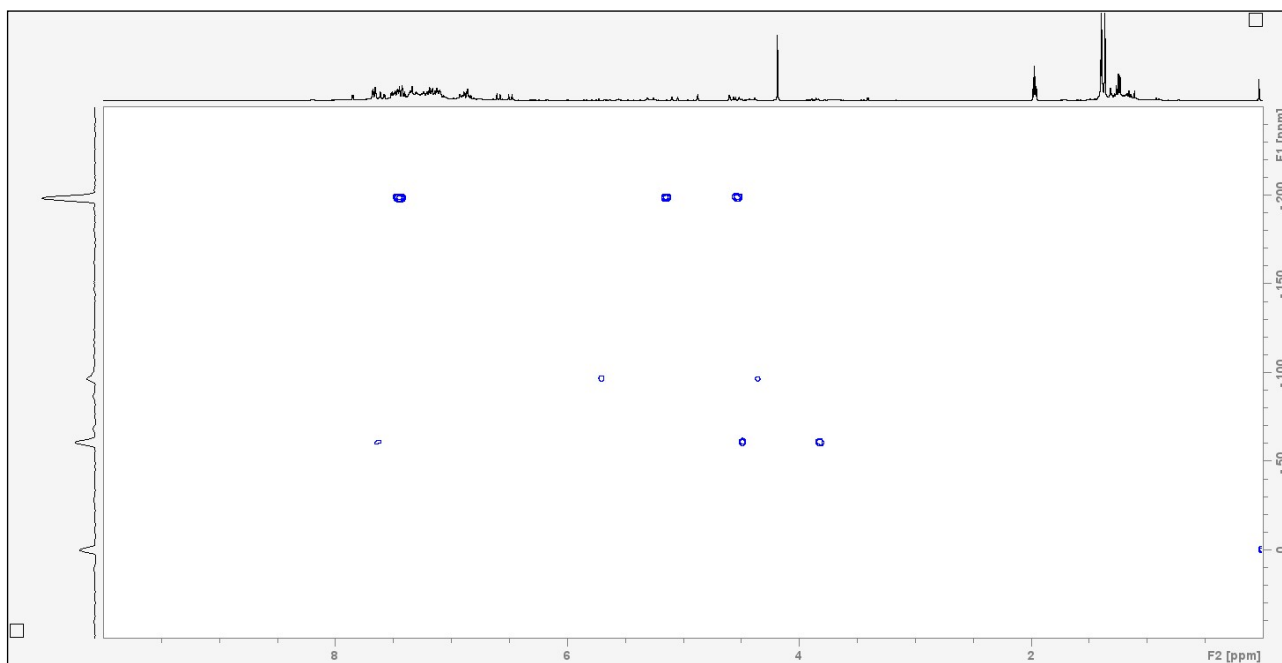

Figure S53. 2D NMR HMBC  $^{29}\text{Si}$ - $^1\text{H}$  (without  $J_1$  suppression) spectra of the reaction between  $[\text{Cu}(\text{L}^1)_2]$  and  $\text{PhSiH}_3$ , in  $\text{CD}_3\text{CN}$ .

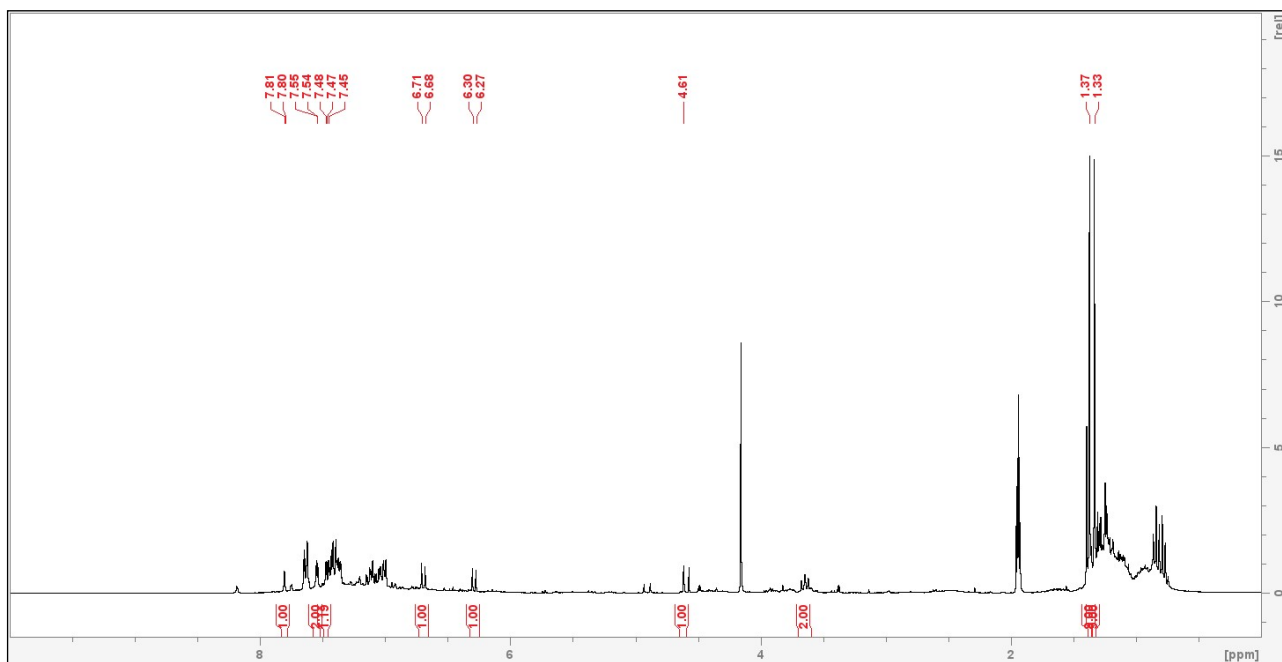

Figure S54.  $^1\text{H}$  NMR spectra of the reaction between  $[\text{Cu}(\text{L}^2)_2]$  and  $\text{PhSiH}_3$ , in  $\text{CD}_3\text{CN}$ .

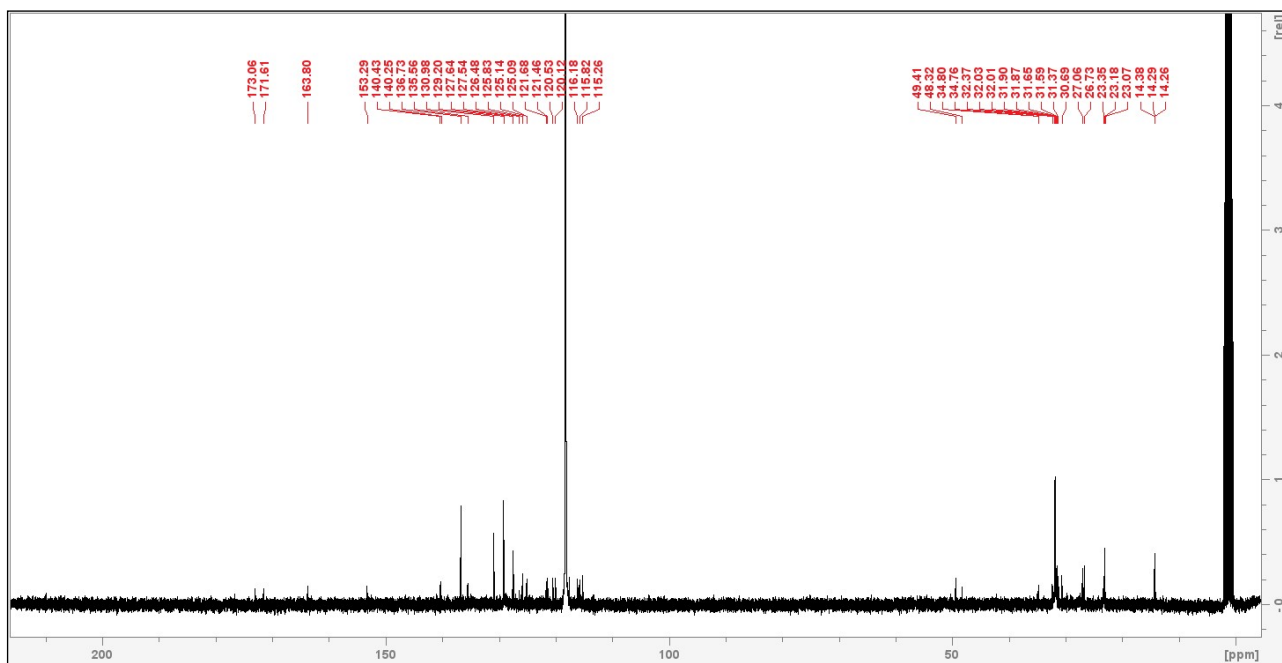

Figure S55.  $^{13}\text{C}$  NMR spectra of the reaction between  $[\text{Cu}(\text{L}^2)_2]$  and  $\text{PhSiH}_3$ , in  $\text{CD}_3\text{CN}$ .

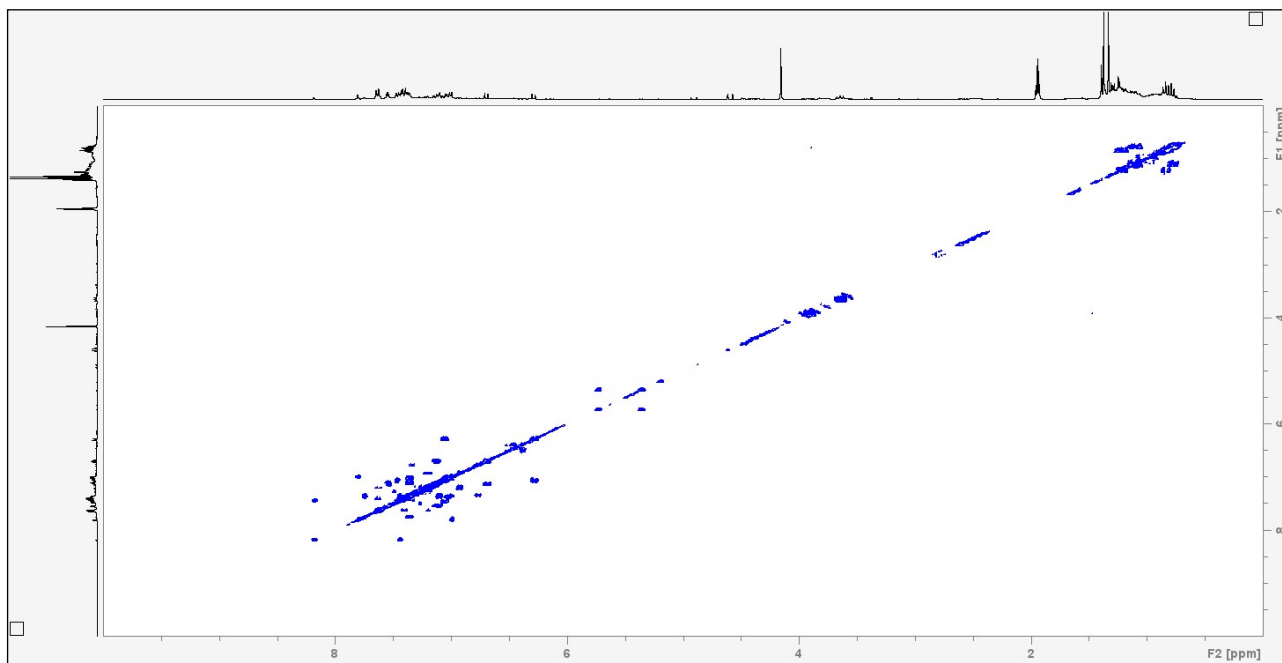

Figure S56. 2D NMR COSY  $^1\text{H}$ - $^1\text{H}$  spectra of the reaction between  $[\text{Cu}(\text{L}^2)_2]$  and  $\text{PhSiH}_3$ , in  $\text{CD}_3\text{CN}$ .

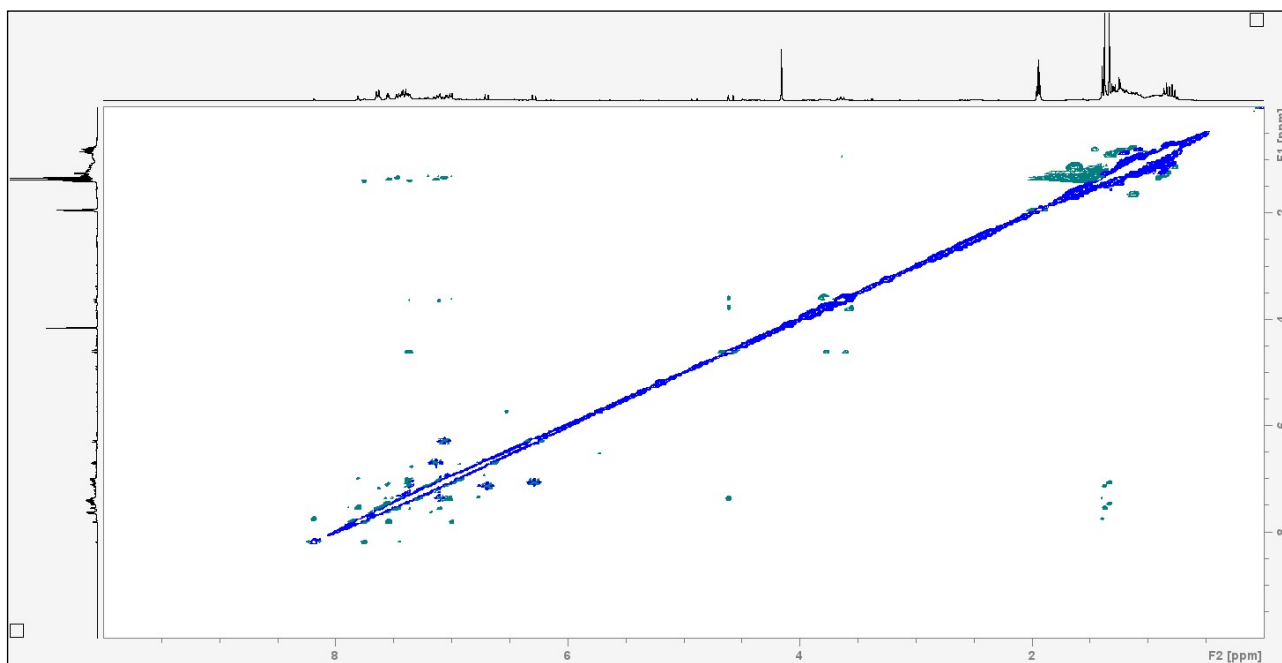

Figure S57. 2D NMR NOESY  $^1\text{H}$ - $^1\text{H}$  spectra of the reaction between  $[\text{Cu}(\text{L}^2)_2]$  and  $\text{PhSiH}_3$ , in  $\text{CD}_3\text{CN}$ .

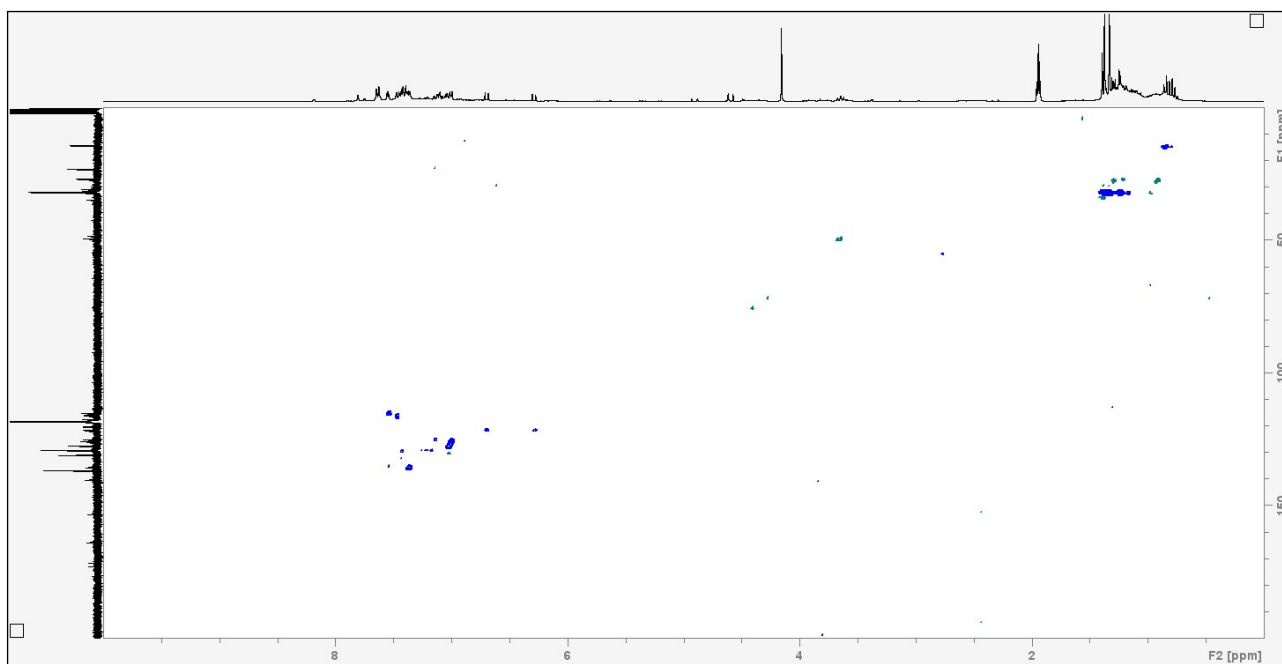

Figure S58. 2D NMR HSQC INEPT  $^{13}\text{C}$ - $^1\text{H}$  spectra of the reaction between  $[\text{Cu}(\text{L}^2)_2]$  and  $\text{PhSiH}_3$ , in  $\text{CD}_3\text{CN}$ .

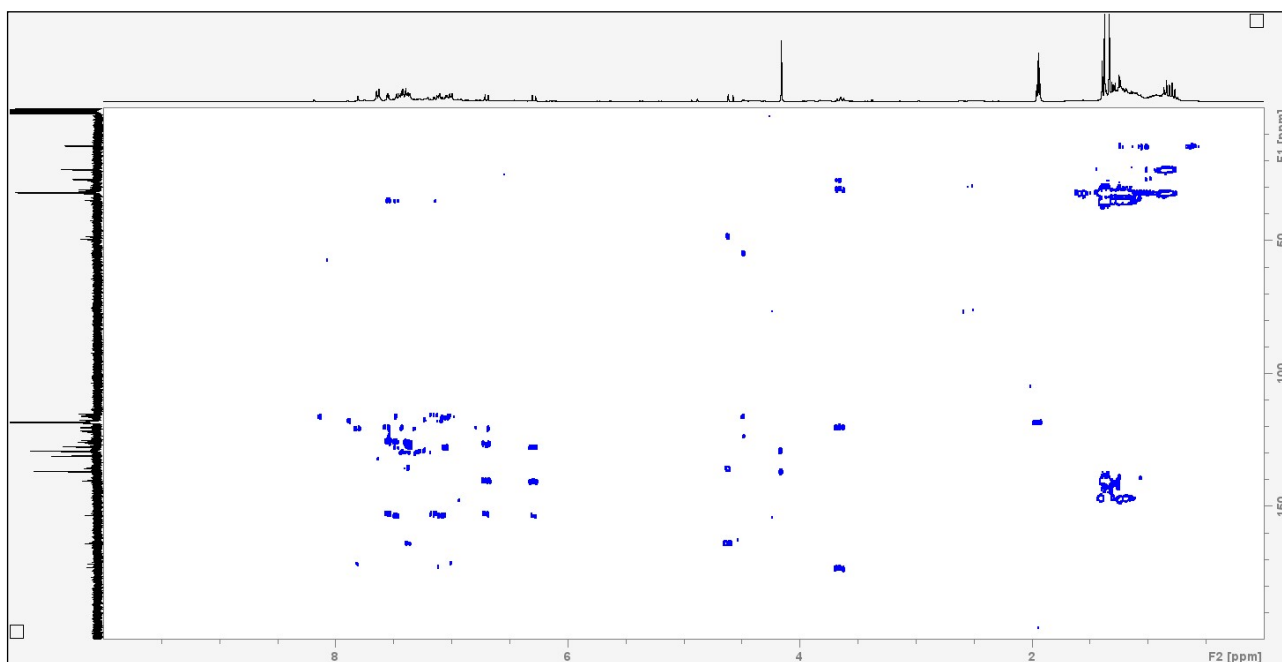

Figure S59. 2D NMR HMBC  $^{13}\text{C}$ - $^1\text{H}$  spectra of the reaction between  $[\text{Cu}(\text{L}^2)_2]$  and  $\text{PhSiH}_3$ , in  $\text{CD}_3\text{CN}$ .

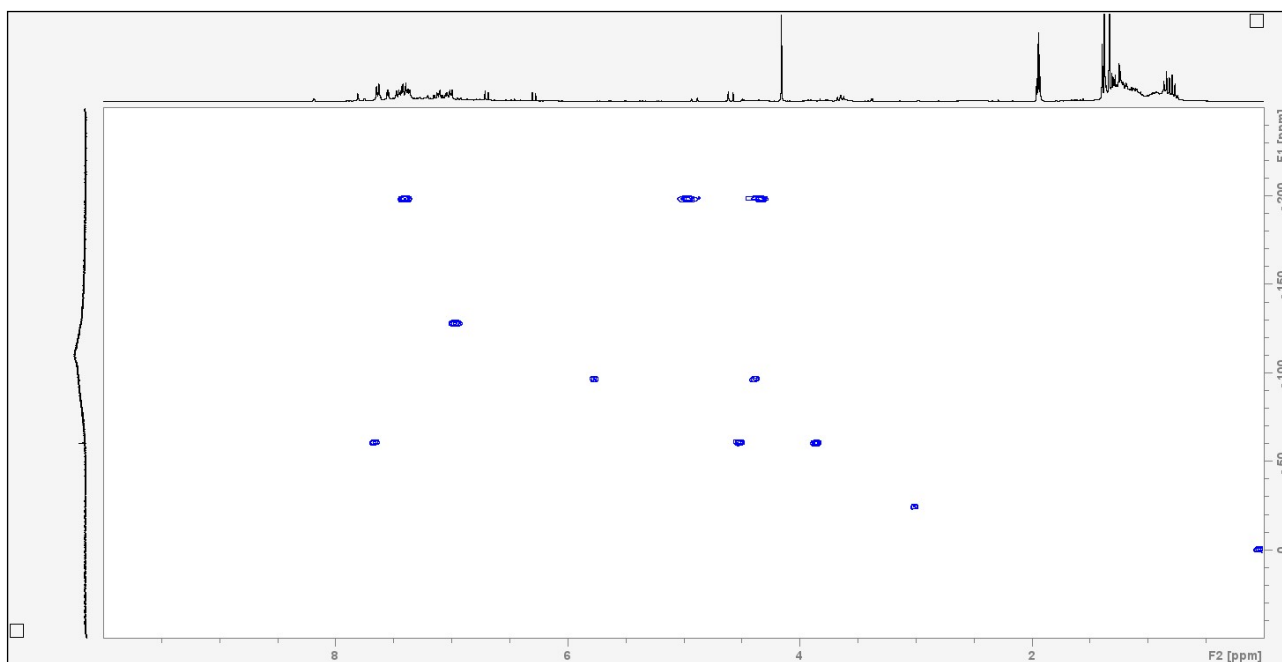

Figure S60. 2D NMR HMBC  $^{29}\text{Si}$ - $^1\text{H}$  (without  $J_1$  suppression) spectra of the reaction between  $[\text{Cu}(\text{L}^2)_2]$  and  $\text{PhSiH}_3$ , in  $\text{CD}_3\text{CN}$ .

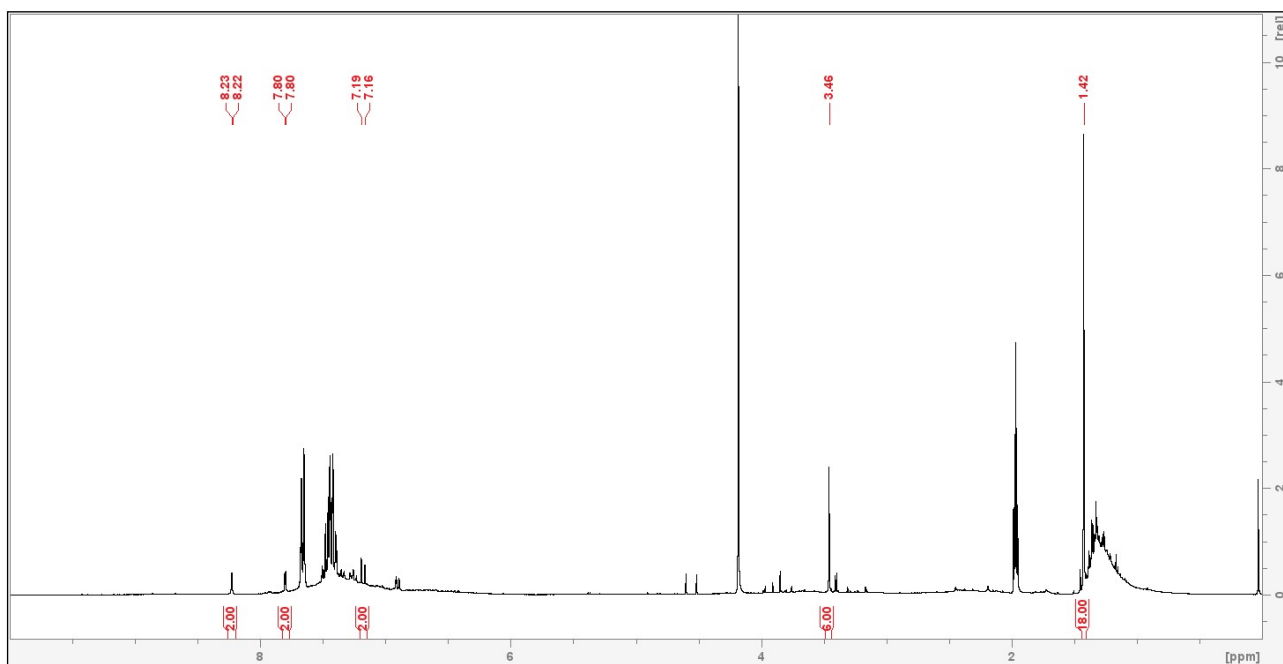

Figure S61.  $^1\text{H}$  NMR spectra of the reaction between  $[\text{Cu}(\text{L}^3)_2]$  and  $\text{PhSiH}_3$ , in  $\text{CD}_3\text{CN}$ .

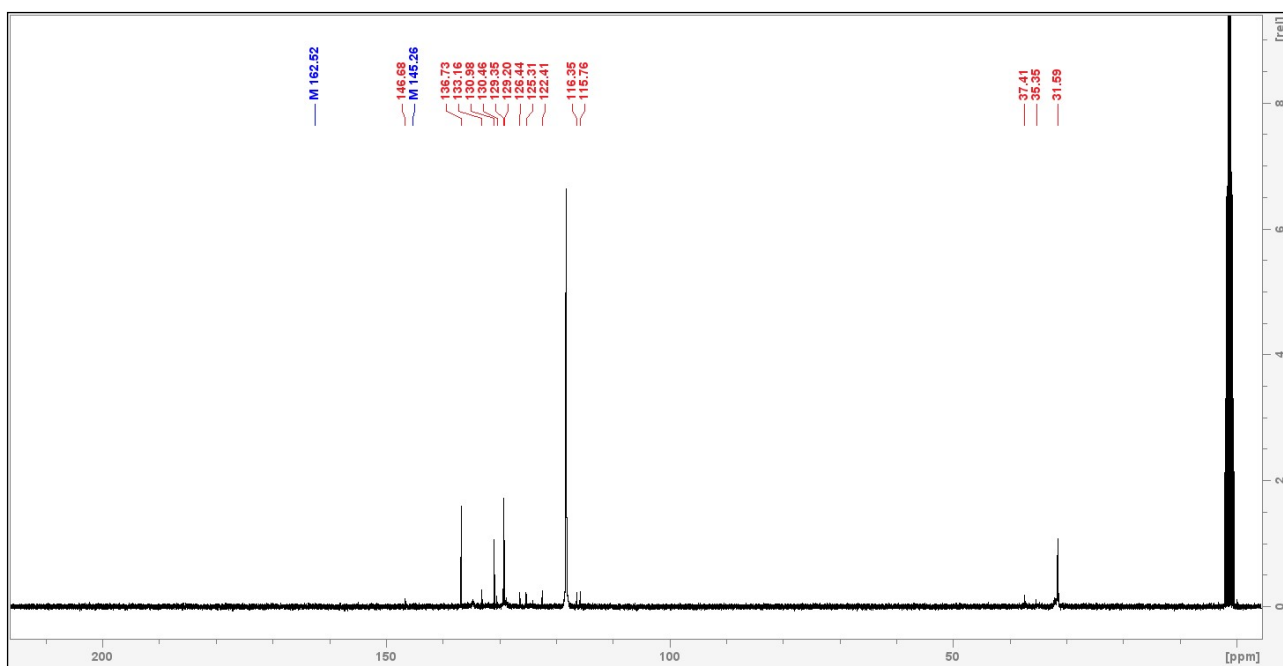

Figure S62.  $^{13}\text{C}$  NMR spectra of the reaction between  $[\text{Cu}(\text{L}^3)_2]$  and  $\text{PhSiH}_3$ , in  $\text{CD}_3\text{CN}$ .

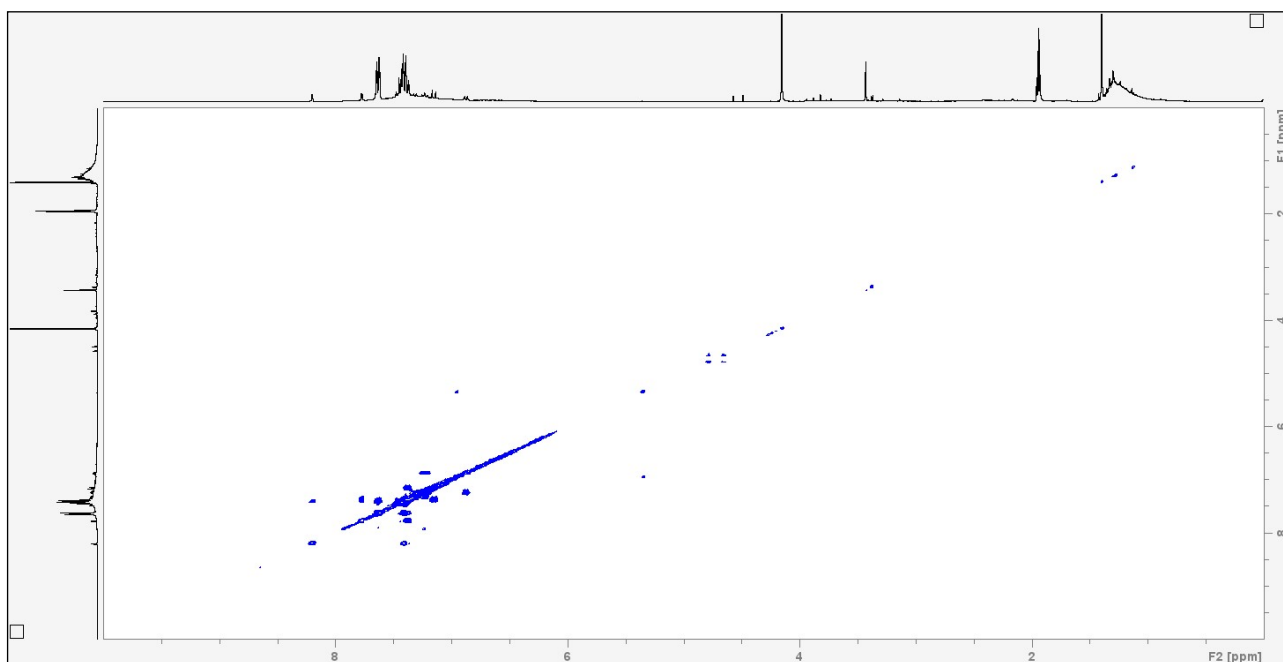

Figure S63. 2D NMR COSY  $^1\text{H}$ - $^1\text{H}$  spectra of the reaction between  $[\text{Cu}(\text{L}^3)_2]$  and  $\text{PhSiH}_3$ , in  $\text{CD}_3\text{CN}$ .

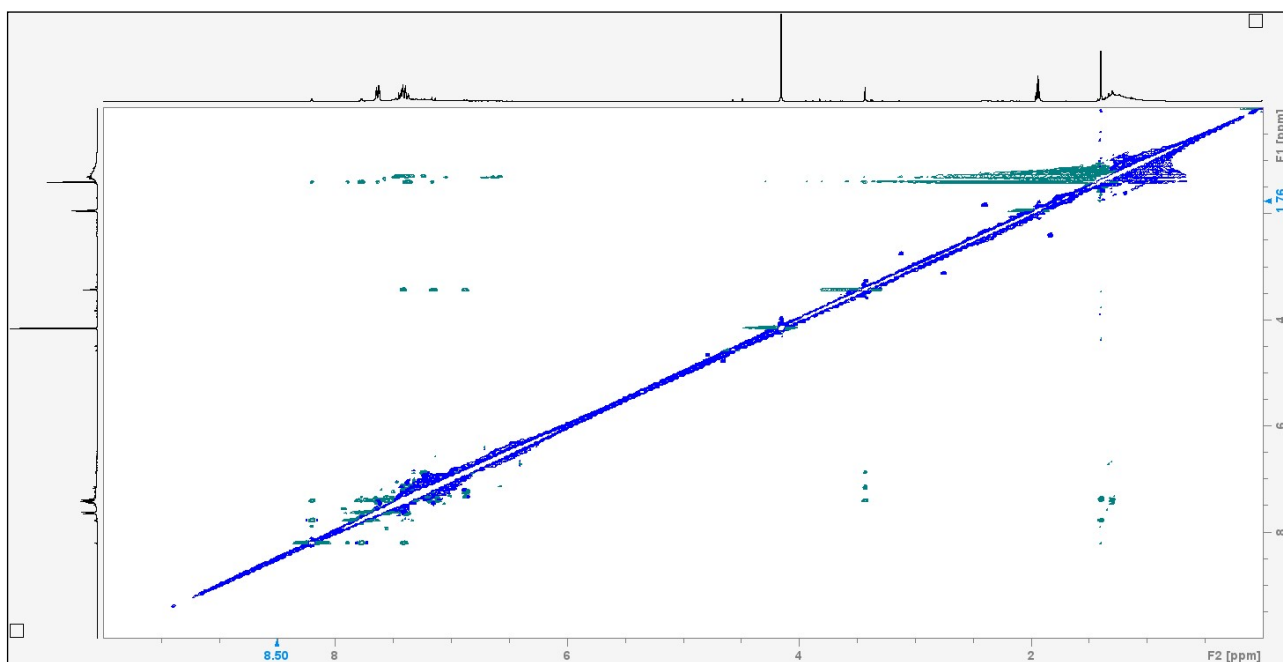

Figure S64. 2D NMR NOE  $^1\text{H}$ - $^1\text{H}$  spectra of the reaction between  $[\text{Cu}(\text{L}^3)_2]$  and  $\text{PhSiH}_3$ , in  $\text{CD}_3\text{CN}$ .

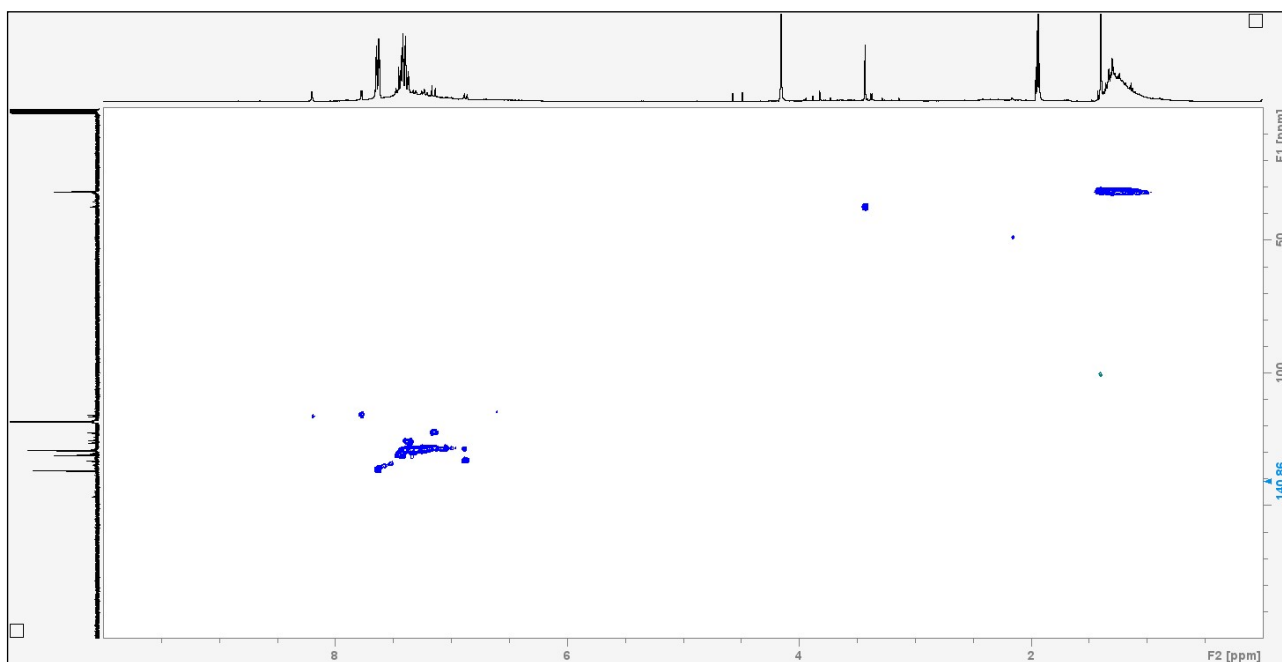

Figure S65. 2D NMR HSQC INEPT  $^{13}\text{C}$ - $^1\text{H}$  spectra of the reaction between  $[\text{Cu}(\text{L}^3)_2]$  and  $\text{PhSiH}_3$ , in  $\text{CD}_3\text{CN}$ .

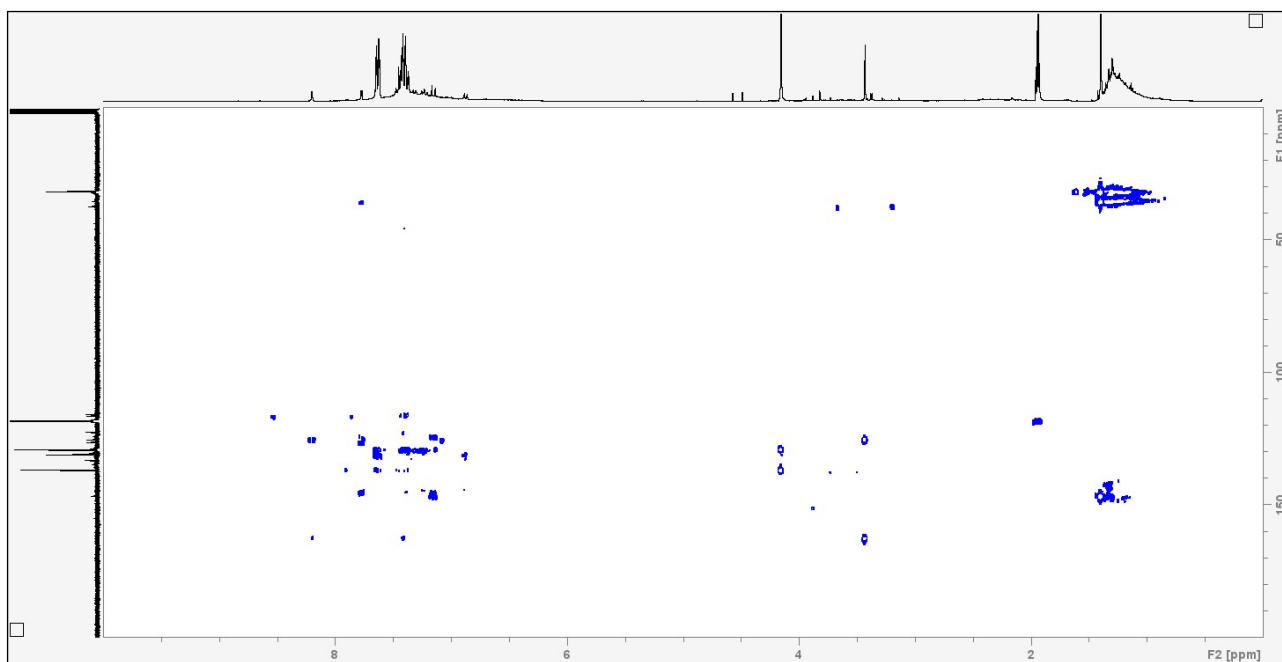

Figure S66. 2D NMR HMBC  $^{13}\text{C}$ - $^1\text{H}$  spectra of the reaction between  $[\text{Cu}(\text{L}^3)_2]$  and  $\text{PhSiH}_3$ , in  $\text{CD}_3\text{CN}$ .



## 12. Computational details

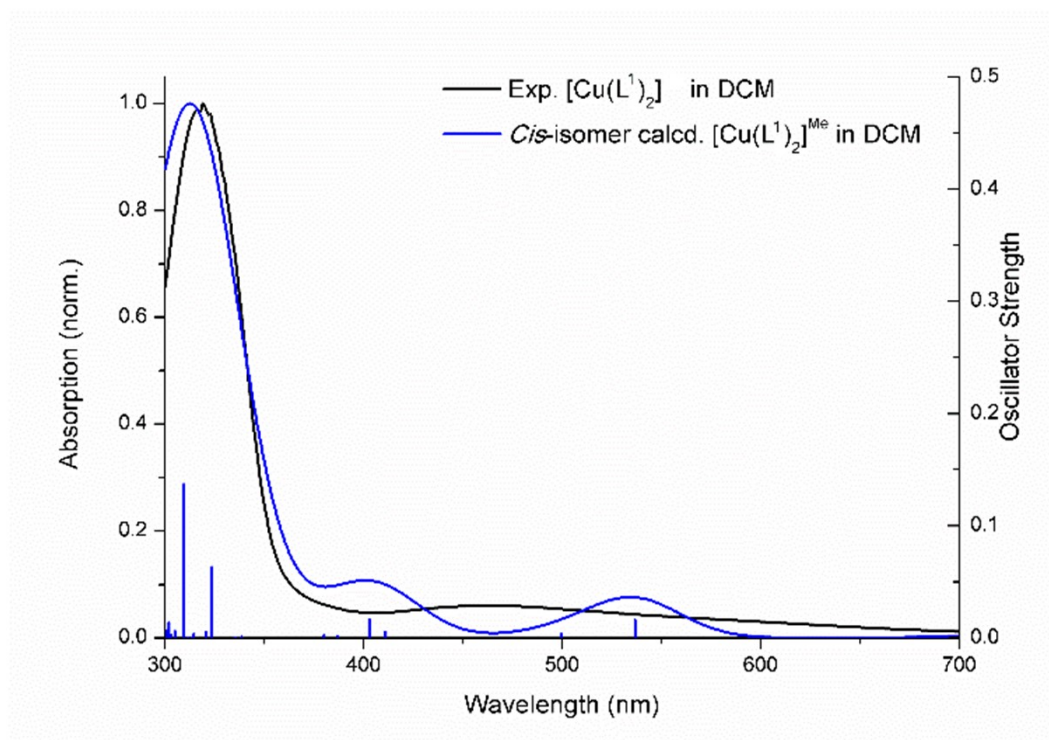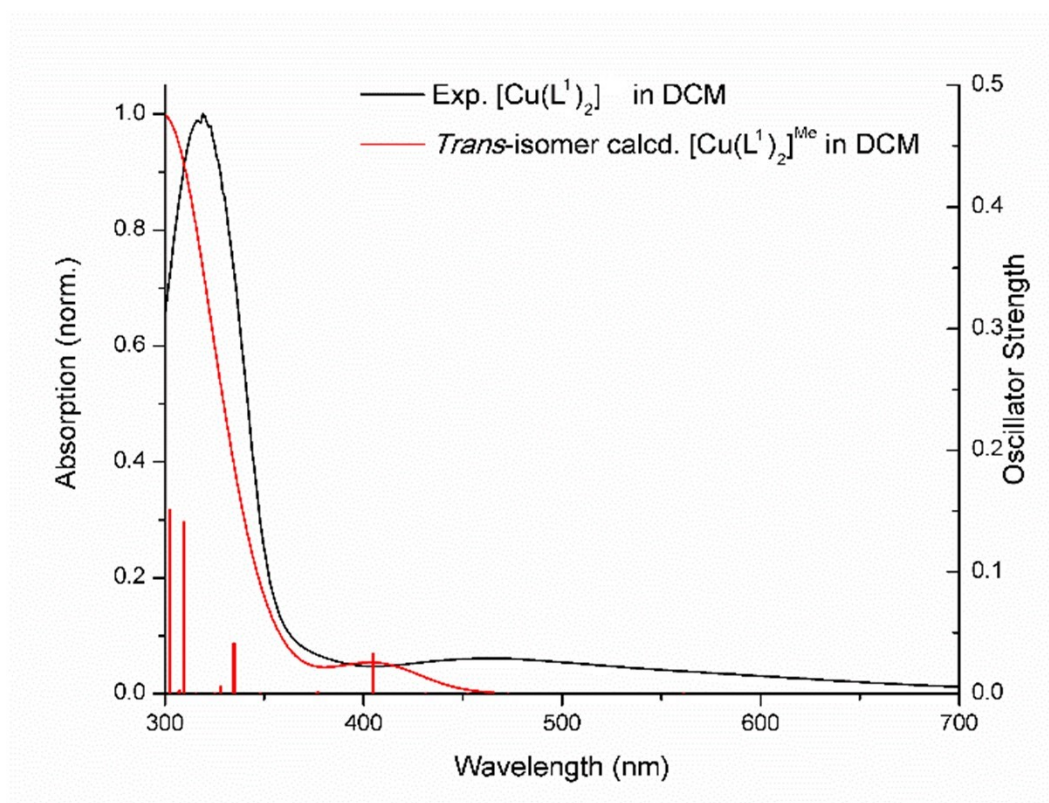

**Figure S67.** Predicted absorption spectra of *cis*- $[\text{Cu}(\text{L}^1)_2]^{\text{Me}}$  (top) and *trans*- $[\text{Cu}(\text{L}^1)_2]^{\text{Me}}$  (bottom) and comparison with the experimental spectrum of  $[\text{Cu}(\text{L}^1)_2]$ . Calculations at the TDDFT ZORA PBE0 ZORA-Def2-TZVPP D3BJ level of theory with inclusion of solvent effects for DCM with the CPCM method.

XYZ coordinates of  $[\text{Cu}(\text{L}^1)_2]^{\text{Me}}$  *trans*-isomer

|   |              |             |              |    |              |             |              |
|---|--------------|-------------|--------------|----|--------------|-------------|--------------|
| C | 8.083474000  | 3.714977000 | 8.931058000  | C  | 2.993034000  | 6.564519000 | 10.731060000 |
| C | 9.684907000  | 2.129227000 | 8.924663000  | C  | 2.672549000  | 5.210355000 | 10.566927000 |
| H | 10.408884000 | 1.453227000 | 8.487980000  | H  | 3.418628000  | 4.547987000 | 10.126826000 |
| C | 9.348327000  | 2.357852000 | 10.217819000 | C  | 1.438335000  | 4.728139000 | 10.993878000 |
| H | 9.693338000  | 1.888383000 | 11.127923000 | H  | 1.198946000  | 3.673067000 | 10.868496000 |
| C | 8.966768000  | 2.973487000 | 6.705386000  | C  | 0.512331000  | 5.588373000 | 11.587919000 |
| H | 8.157943000  | 3.622220000 | 6.364591000  | H  | -0.451903000 | 5.207234000 | 11.921413000 |
| H | 8.790449000  | 1.953767000 | 6.342617000  | C  | 0.828063000  | 6.934450000 | 11.759661000 |
| C | 10.295095000 | 3.488768000 | 6.216584000  | H  | 0.112642000  | 7.609315000 | 12.227453000 |
| C | 10.614165000 | 4.843272000 | 6.380722000  | C  | 2.064898000  | 7.418692000 | 11.331288000 |
| H | 9.867190000  | 5.504983000 | 6.820284000  | H  | 2.313642000  | 8.471584000 | 11.471003000 |
| C | 11.848223000 | 5.326601000 | 5.954580000  | C  | 5.565300000  | 6.243536000 | 5.571264000  |
| H | 12.086525000 | 6.381915000 | 6.080036000  | C  | 6.890650000  | 5.750170000 | 5.670913000  |
| C | 12.775456000 | 4.467167000 | 5.361286000  | C  | 7.525332000  | 5.442562000 | 4.441918000  |
| H | 13.739566000 | 4.849162000 | 5.028418000  | H  | 8.562277000  | 5.112597000 | 4.485187000  |
| C | 12.461102000 | 3.120779000 | 5.189486000  | C  | 6.873747000  | 5.557094000 | 3.225293000  |
| H | 13.177485000 | 2.446528000 | 4.722279000  | H  | 7.409166000  | 5.298115000 | 2.310913000  |
| C | 11.224429000 | 2.635412000 | 5.617068000  | C  | 5.538760000  | 5.982276000 | 3.145059000  |
| H | 10.976783000 | 1.582265000 | 5.477316000  | C  | 4.909778000  | 6.324513000 | 4.339240000  |
| C | 7.721301000  | 3.808082000 | 11.375312000 | H  | 3.869644000  | 6.648458000 | 4.312265000  |
| C | 6.395729000  | 4.300838000 | 11.275281000 | Cu | 6.643315000  | 5.025442000 | 8.472985000  |
| C | 5.760658000  | 4.608289000 | 12.504107000 | N  | 8.368908000  | 3.333854000 | 10.205065000 |
| H | 4.723551000  | 4.937724000 | 12.460640000 | N  | 8.897063000  | 2.957729000 | 8.160360000  |
| C | 6.412030000  | 4.494131000 | 13.720892000 | N  | 4.918141000  | 6.717921000 | 6.741696000  |
| H | 5.876281000  | 4.752906000 | 14.635138000 | N  | 4.390529000  | 7.094162000 | 8.786523000  |
| C | 7.747180000  | 4.069560000 | 13.801489000 | O  | 5.771620000  | 4.477765000 | 10.145634000 |
| C | 8.376596000  | 3.727512000 | 12.607473000 | O  | 7.514954000  | 5.572722000 | 6.800380000  |
| H | 9.416856000  | 3.403990000 | 12.634664000 | C  | 4.821423000  | 6.055716000 | 1.826588000  |
| C | 5.203605000  | 6.336555000 | 8.015644000  | H  | 5.364238000  | 6.684615000 | 1.108808000  |
| C | 3.939038000  | 7.694235000 | 6.729183000  | H  | 4.715126000  | 5.062512000 | 1.369681000  |
| H | 3.593985000  | 8.163866000 | 5.819176000  | H  | 3.815484000  | 6.474899000 | 1.940331000  |
| C | 3.602745000  | 7.922886000 | 8.022402000  | C  | 8.464334000  | 3.996837000 | 15.120101000 |
| H | 2.879039000  | 8.599052000 | 8.459280000  | H  | 7.919875000  | 3.370765000 | 15.839082000 |
| C | 4.321534000  | 7.078651000 | 10.241548000 | H  | 9.469195000  | 3.574849000 | 15.007183000 |
| H | 4.498839000  | 8.098267000 | 10.604116000 | H  | 8.573221000  | 4.990661000 | 15.575078000 |
| H | 5.130054000  | 6.429310000 | 10.581921000 |    |              |             |              |

XYZ coordinates of  $[\text{Cu}(\text{L}^1)_2]^{\text{Me}}$  *cis-isomer*

|   |              |             |              |    |              |             |              |
|---|--------------|-------------|--------------|----|--------------|-------------|--------------|
| C | 7.705078000  | 3.923621000 | 9.015696000  | C  | 9.394725000  | 7.699341000 | 8.679123000  |
| C | 8.725097000  | 1.921875000 | 9.126304000  | H  | 8.306632000  | 7.650155000 | 8.707463000  |
| H | 8.909718000  | 0.883344000 | 8.881730000  | C  | 10.066895000 | 8.553142000 | 9.549713000  |
| C | 9.299632000  | 2.730268000 | 10.057506000 | H  | 9.496431000  | 9.158024000 | 10.250922000 |
| H | 10.068923000 | 2.528445000 | 10.790016000 | C  | 11.459866000 | 8.613366000 | 9.539991000  |
| C | 6.862431000  | 2.210868000 | 7.452407000  | H  | 11.981737000 | 9.280752000 | 10.224273000 |
| H | 5.833511000  | 2.449532000 | 7.743406000  | C  | 12.180741000 | 7.815164000 | 8.653863000  |
| H | 6.943437000  | 1.117603000 | 7.412796000  | H  | 13.268931000 | 7.857899000 | 8.638401000  |
| C | 7.170939000  | 2.816840000 | 6.106933000  | C  | 11.506576000 | 6.964026000 | 7.779300000  |
| C | 8.467593000  | 2.773352000 | 5.585311000  | H  | 12.072663000 | 6.342783000 | 7.084015000  |
| H | 9.266119000  | 2.300355000 | 6.157878000  | C  | 4.641755000  | 6.596570000 | 6.158852000  |
| C | 8.749533000  | 3.347129000 | 4.347634000  | C  | 4.052393000  | 6.291600000 | 7.418200000  |
| H | 9.763337000  | 3.309654000 | 3.950868000  | C  | 2.632583000  | 6.266829000 | 7.432022000  |
| C | 7.734123000  | 3.964553000 | 3.615749000  | H  | 2.166776000  | 6.060389000 | 8.394039000  |
| H | 7.954722000  | 4.417336000 | 2.650368000  | C  | 1.871509000  | 6.480006000 | 6.298227000  |
| C | 6.439045000  | 4.006139000 | 4.127777000  | H  | 0.783948000  | 6.438545000 | 6.372879000  |
| H | 5.641534000  | 4.498634000 | 3.573968000  | C  | 2.467167000  | 6.737235000 | 5.051315000  |
| C | 6.160773000  | 3.438888000 | 5.370248000  | C  | 3.856361000  | 6.787982000 | 5.015336000  |
| H | 5.153913000  | 3.511922000 | 5.781658000  | H  | 4.347523000  | 6.967574000 | 4.059087000  |
| C | 8.917906000  | 5.072599000 | 10.807328000 | Cu | 6.490695000  | 5.407999000 | 8.658253000  |
| C | 7.845436000  | 5.966635000 | 11.097727000 | N  | 8.660901000  | 3.953830000 | 9.970530000  |
| C | 8.145856000  | 6.956688000 | 12.070649000 | N  | 7.750946000  | 2.672668000 | 8.505171000  |
| H | 7.329925000  | 7.620852000 | 12.351086000 | N  | 6.053540000  | 6.703675000 | 6.048307000  |
| C | 9.410815000  | 7.105311000 | 12.611158000 | N  | 8.155121000  | 6.361142000 | 6.341386000  |
| H | 9.586776000  | 7.903930000 | 13.333773000 | O  | 6.681351000  | 5.919058000 | 10.541271000 |
| C | 10.480573000 | 6.273596000 | 12.236647000 | O  | 4.707744000  | 6.053775000 | 8.506591000  |
| C | 10.197496000 | 5.251430000 | 11.337103000 | C  | 1.637044000  | 6.943830000 | 3.815930000  |
| H | 11.000851000 | 4.588088000 | 11.014305000 | H  | 0.998248000  | 6.075216000 | 3.606828000  |
| C | 6.939305000  | 6.087449000 | 6.867629000  | H  | 0.973933000  | 7.813591000 | 3.917302000  |
| C | 6.716779000  | 7.379082000 | 5.039583000  | H  | 2.266358000  | 7.111201000 | 2.934408000  |
| H | 6.202984000  | 7.971289000 | 4.295903000  | C  | 11.871866000 | 6.504331000 | 12.752454000 |
| C | 8.043699000  | 7.160740000 | 5.227446000  | H  | 11.876200000 | 6.699268000 | 13.832265000 |
| H | 8.905032000  | 7.516964000 | 4.677193000  | H  | 12.516564000 | 5.637622000 | 12.566763000 |
| C | 9.412397000  | 5.901958000 | 6.893992000  | H  | 12.341093000 | 7.369506000 | 12.262118000 |
| H | 10.062646000 | 5.610921000 | 6.061322000  |    |              |             |              |
| H | 9.188293000  | 4.988403000 | 7.454610000  |    |              |             |              |
| C | 10.110855000 | 6.896349000 | 7.786842000  |    |              |             |              |

### 13. References

- [1] A. Mondal, A. K. Suresh, G. Sivakumar, E. Balaraman, *Org. Lett.* **2022**, *24*, 8990–8995.
- [2] X.-F. Li, X.-G. Zhang, F. Chen, X.-H. Zhang, *J. Org. Chem.* **2018**, *83*, 12815–12821.
- [3] Z. Guo, T. Pang, L. Yan, X. Wei, J. Chao, C. Xi, *Green Chem.* **2021**, *23*, 7534–7538.
- [4] G. Li, J. Chen, D.-Y. Zhu, Y. Chen, J.-B. Xia, *Adv. Synth. Catal.* **2018**, *360*, 2364–2369.
- [5] A. E. Wahba, M. T. Hamann, *J. Org. Chem.* **2012**, *77*, 4578–4585.
- [6] V. Kanaujiya, V. Tiwari, S. Baranwal, V. Srivastava, J. Kandasamy, *Synlett* **2023**, *34*, 970–974.
- [7] T. A. Gokhale, S. C. Gulhane, B. M. Bhanage, *Eur. J. Org. Chem.* **2023**, *26*, e202200997.
- [8] Z. Wang, S. Chen, C. Chen, Y. Yang, C. Wang, *Angew. Chem. Int. Ed.* **2023**, *62*, e202215963.
